# Supplementary material
Source: PubMed Central journal article supplement (PMC2889356)
Supplement: 0912613107_stxt01.pdf [file 0912613107_stxt01.pdf]

Supporting Appendix:

Tab. S1: List of 60 complete mitochondrial genomes

| Accession Number | Order          | Family          | Genus         | Species                        |
|------------------|----------------|-----------------|---------------|--------------------------------|
| NC_002504        | Artiodactyla   | Camelidae       | Lama          | <i>Lama pacos</i>              |
| NC_009628        | Artiodactyla   | Camelidae       | Camelus       | <i>Camelus bactrianus</i>      |
| NC_000845        | Artiodactyla   | Suidae          | Sus           | <i>Sus scrofa</i>              |
| NC_008830        | Artiodactyla   | Suidae          | Phacochoerus  | <i>Phacochoerus africanus</i>  |
| NC_007703        | Artiodactyla   | Cervidae        | Rangifer      | <i>Rangifer tarandus</i>       |
| NC_004563        | Artiodactyla   | Cervidae        | Muntiacus     | <i>Muntiacus muntjak</i>       |
| NC_008749        | Artiodactyla   | Cervidae        | Elaphodus     | <i>Elaphodus cephalophus</i>   |
| NC_008462        | Artiodactyla   | Cervidae        | Cervus        | <i>Cervus nippon taiouanus</i> |
| NC_006295        | Artiodactyla   | Bovidae         | Bubalus       | <i>Bubalus bubalis</i>         |
| NC_005971        | Artiodactyla   | Bovidae         | Bos           | <i>Bos indicus</i>             |
| NC_007441        | Artiodactyla   | Bovidae         | Pantholops    | <i>Pantholops hodgsonii</i>    |
| NC_001941        | Artiodactyla   | Bovidae         | Ovis          | <i>Ovis aries</i>              |
| NC_000889        | Artiodactyla   | Hippopotamidae  | Hippopotamus  | <i>Hippopotamus amphibius</i>  |
| NC_005280        | Cetacea        | Phocoenidae     | Phocoena      | <i>Phocoena phocoena</i>       |
| NC_005277        | Cetacea        | Pontoporiidae   | Pontoporia    | <i>Pontoporia blainvillei</i>  |
| NC_005273        | Cetacea        | Ziphiidae       | Hyperoodon    | <i>Hyperoodon ampullatus</i>   |
| NC_005269        | Cetacea        | Neobalaenidae   | Caperea       | <i>Caperea marginata</i>       |
| NC_006928        | Cetacea        | Balaenopteridae | Balaenoptera  | <i>Balaenoptera brydei</i>     |
| NC_006930        | Cetacea        | Balaenidae      | Eubalaena     | <i>Eubalaena australis</i>     |
| NC_002503        | Cetacea        | Physeteridae    | Physeter      | <i>Physeter catodon</i>        |
| NC_001788        | Perissodactyla | Equidae         | Equus         | <i>Equus asinus</i>            |
| NC_001779        | Perissodactyla | Rhinocerotidae  | Rhinoceros    | <i>Rhinoceros unicornis</i>    |
| NC_004027        | Pholidota      | Manidae         | Manis         | <i>Manis tetradactyla</i>      |
| NC_006835        | Carnivora      | Herpestidae     | Herpestes     | <i>Herpestes javanicus</i>     |
| NC_001700        | Carnivora      | Felidae         | Felis         | <i>Felis catus</i>             |
| NC_008434        | Carnivora      | Canidae         | Vulpes        | <i>Vulpes vulpes</i>           |
| NC_008092        | Carnivora      | Canidae         | Canis         | <i>Canis lupus</i>             |
| NC_009492        | Carnivora      | Ursidae         | Ailuropoda    | <i>Ailuropoda melanoleuca</i>  |
| NC_003427        | Carnivora      | Ursidae         | Ursus         | <i>Ursus arctos</i>            |
| NC_009691        | Carnivora      | Ailuridae       | Ailurus       | <i>Ailurus fulgens styani</i>  |
| NC_009678        | Carnivora      | Mustelidae      | Martes        | <i>Martes melampus</i>         |
| NC_004029        | Carnivora      | Odobenidae      | Odobenus      | <i>Odobenus rosmarus</i>       |
| NC_008418        | Carnivora      | Otariidae       | Phocartos     | <i>Phocartos hookeri</i>       |
| NC_008422        | Carnivora      | Phocidae        | Mirounga      | <i>Mirounga leonina</i>        |
| NC_008424        | Carnivora      | Phocidae        | Leptonychotes | <i>Leptonychotes weddellii</i> |
| NC_008426        | Carnivora      | Phocidae        | Erignathus    | <i>Erignathus barbatus</i>     |
| NC_001325        | Carnivora      | Phocidae        | Phoca         | <i>Phoca vitulina</i>          |
| NC_005433        | Chiroptera     | Rhinolophidae   | Rhinolophus   | <i>Rhinolophus monaceros</i>   |

|           |             |                  |              |                                  |
|-----------|-------------|------------------|--------------|----------------------------------|
| NC_005434 | Chiroptera  | Rhinolophidae    | Rhinolophus  | <i>Rhinolophus pumilus</i>       |
| NC_011304 | Chiroptera  | Rhinolophidae    | Rhinolophus  | <i>Rhinolophus formosae</i>      |
| NC_002612 | Chiroptera  | Pteropodidae     | Pteropus     | <i>Pteropus dasymallus</i>       |
| NC_002619 | Chiroptera  | Pteropodidae     | Pteropus     | <i>Pteropus scapulatus</i>       |
| NC_007393 | Chiroptera  | Pteropodidae     | Rousettus    | <i>Rousettus aegyptiacus</i>     |
| NC_005436 | Chiroptera  | Vespertilionidae | Pipistrellus | <i>Pipistrellus abramus</i>      |
| NC_002626 | Chiroptera  | Vespertilionidae | Chalinolobus | <i>Chalinolobus tuberculatus</i> |
| NC_006925 | Chiroptera  | Mystacinidae     | Mystacina    | <i>Mystacina tuberculata</i>     |
| NC_002009 | Chiroptera  | Phyllostomidae   | Artibeus     | <i>Artibeus jamaicensis</i>      |
| NC_006893 | Insectivora | Soricidae        | Crocidura    | <i>Crocidura russula</i>         |
| NC_003040 | Insectivora | Soricidae        | Episoriculus | <i>Episoriculus fumidus</i>      |
| NC_005435 | Insectivora | Soricidae        | Sorex        | <i>Sorex unguiculatus</i>        |
| NC_002808 | Insectivora | Erinaceidae      | Echinosorex  | <i>Echinosorex gymmura</i>       |
| NC_005033 | Insectivora | Erinaceidae      | Hemiechinus  | <i>Hemiechinus auritus</i>       |
| NC_002080 | Insectivora | Erinaceidae      | Erinaceus    | <i>Erinaceus europaeus</i>       |
| NC_005035 | Insectivora | Talpidae         | Mogera       | <i>Mogera wogura</i>             |
| NC_002391 | Insectivora | Talpidae         | Talpa        | <i>Talpa europaea</i>            |
| NC_005034 | Insectivora | Talpidae         | Urotrichus   | <i>Urotrichus talpoides</i>      |
| NC_008156 | Insectivora | Talpidae         | Galemys      | <i>Galemys pyrenaicus</i>        |
| NC_001665 | Rodentia    | Muridae          | Rattus       | <i>Rattus norvegicus</i>         |
| NC_010339 | Rodentia    | Muridae          | Mus          | <i>Mus musculus</i>              |
| AF346963  | Primates    | Hominidae        | Homo         | <i>Homo sapiens</i>              |

Tab. S2: The analyses of selective pressure on the branch of common ancestor of bats for 13 mitochondrial genes

| Gene | Model                  | P <sup>1</sup> | Parameters estimated                                                                                                                                                                              | LnL       | 2ΔlnL(LRT)                                                     | Positively selected sites <sup>II</sup> |
|------|------------------------|----------------|---------------------------------------------------------------------------------------------------------------------------------------------------------------------------------------------------|-----------|----------------------------------------------------------------|-----------------------------------------|
| ND1  | Branch models          |                |                                                                                                                                                                                                   |           |                                                                |                                         |
|      | 1ω                     | 1              | ω <sub>0</sub> = 0.0200                                                                                                                                                                           | -21835.24 |                                                                |                                         |
|      | 2ω                     | 2              | ω <sub>0</sub> =0.0189; ω <sub>1</sub> = 0.0582                                                                                                                                                   | -21727.35 |                                                                |                                         |
|      | 2ω (ω <sub>1</sub> =1) | 1              | ω <sub>0</sub> =0.0188                                                                                                                                                                            | -21727.51 |                                                                |                                         |
|      | Free Ratio             | 221            | ω <sub>1</sub> = 0.0294; N=5.4, S=63                                                                                                                                                              | -21621.51 |                                                                |                                         |
|      | Branch-site models     |                |                                                                                                                                                                                                   |           |                                                                |                                         |
|      | Model A1               | 4              | site class      0      1      2a      2b<br>proportion      0.97317 0.02063 0.00607 0.00013<br>background ω    0.01787 1.00000 0.01787 1.00000<br>foreground ω    0.01787 1.00000 1.00000 1.00000 | -21652.39 |                                                                |                                         |
|      | Model A                | 3              | site class      0      1      2a      2b<br>proportion      0.97317 0.02063 0.00607 0.00013<br>background ω    0.01787 1.00000 0.01787 1.00000<br>foreground ω    0.01787 1.00000 1.00000 1.00000 | -21652.39 |                                                                |                                         |
|      | M1a                    | 2              | P <sub>0</sub> = 0.97928; P <sub>1</sub> = 0.02072; ω <sub>0</sub> = 0.01788; ω <sub>1</sub> = 1.00000                                                                                            | -21652.40 |                                                                |                                         |
|      |                        |                |                                                                                                                                                                                                   |           |                                                                |                                         |
| ND2  | Branch models          |                |                                                                                                                                                                                                   |           |                                                                |                                         |
|      | 1ω                     | 1              | ω <sub>0</sub> =0.0407                                                                                                                                                                            | -29386.61 | <b>283.33***</b><br><br><b>P&lt;0.001</b><br><br>0.18 (P=0.67) |                                         |
|      | 2ω                     | 2              | ω <sub>0</sub> =0.0402; ω <sub>1</sub> =999.0000                                                                                                                                                  | -29244.94 |                                                                |                                         |
|      | 2ω (ω <sub>1</sub> =1) | 1              | ω <sub>0</sub> =0.0402                                                                                                                                                                            | -29245.03 |                                                                |                                         |
|      | Free Ratio             | 221            | ω <sub>1</sub> = 999.0000; N=23.3, S=0                                                                                                                                                            | -29102.27 |                                                                |                                         |
|      | Branch-site models     |                |                                                                                                                                                                                                   |           |                                                                |                                         |
|      | Model A1               | 4              | site class      0      1      2a      2b                                                                                                                                                          | -29140.02 |                                                                |                                         |

|         |                             |                                                                |                                                                |         |           |           |          |                             |                                      |  |  |
|---------|-----------------------------|----------------------------------------------------------------|----------------------------------------------------------------|---------|-----------|-----------|----------|-----------------------------|--------------------------------------|--|--|
|         |                             |                                                                | proportion                                                     | 0.69334 | 0.03252   | 0.26186   | 0.01228  |                             |                                      |  |  |
|         |                             |                                                                | background $\omega$                                            | 0.04205 | 1.00000   | 0.04205   | 1.00000  |                             |                                      |  |  |
|         |                             |                                                                | foreground $\omega$                                            | 0.04205 | 1.00000   | 1.00000   | 1.00000  |                             |                                      |  |  |
|         | Model A                     | 3                                                              | site class                                                     | 0       | 1         | 2a        | 2b       | -29140.02                   |                                      |  |  |
|         |                             |                                                                | proportion                                                     | 0.69334 | 0.03252   | 0.26186   | 0.01228  |                             |                                      |  |  |
|         |                             |                                                                | background $\omega$                                            | 0.04205 | 1.00000   | 0.04205   | 1.00000  |                             |                                      |  |  |
|         |                             |                                                                | foreground $\omega$                                            | 0.04205 | 1.00000   | 1.00000   | 1.00000  |                             |                                      |  |  |
|         | M1a                         | 2                                                              | $P_0=0.95338; P_1=0.04662; \omega_0=0.04234; \omega_1=1.00000$ |         |           |           |          | -29140.43                   |                                      |  |  |
| ND3     | Branch models               |                                                                |                                                                |         |           |           |          |                             |                                      |  |  |
|         | 1 $\omega$                  | 1                                                              | $\omega_0=0.0307$                                              |         |           |           |          | -9062.82                    | <b>153.58***</b>                     |  |  |
|         | 2 $\omega$                  | 2                                                              | $\omega_0=0.0278; \omega_1=999.0000$                           |         |           |           |          | -8986.03                    | <b><math>P&lt;0.001</math></b>       |  |  |
|         | 2 $\omega$ ( $\omega_1=1$ ) | 1                                                              | $\omega_0=0.0278$                                              |         |           |           |          | -8986.05                    | 0.04 ( $P=0.84$ )                    |  |  |
|         | Free Ratio                  | 221                                                            | $\omega_1=123.0597; N=7.7, S=0$                                |         |           |           |          | -8913.98                    |                                      |  |  |
|         | Branch-site models          |                                                                |                                                                |         |           |           |          |                             |                                      |  |  |
|         | Model A1                    | 4                                                              | site class                                                     | 0       | 1         | 2a        | 2b       | -8908.16                    | 2.56                                 |  |  |
|         |                             |                                                                | proportion                                                     | 0.68404 | 0.03801   | 0.26332   | 0.01463  |                             | $P=0.11$                             |  |  |
|         |                             |                                                                | background $\omega$                                            | 0.02467 | 1.00000   | 0.02467   | 1.00000  |                             |                                      |  |  |
|         |                             |                                                                | foreground $\omega$                                            | 0.02467 | 1.00000   | 1.00000   | 1.00000  |                             |                                      |  |  |
| Model A | 3                           | site class                                                     | 0                                                              | 1       | 2a        | 2b        | -8906.88 |                             | 19 L (0.720); <b>27 L (0.993)</b> ;  |  |  |
|         |                             | proportion                                                     | 0.87332                                                        | 0.04853 | 0.07404   | 0.00411   |          |                             | <b>34 I (0.991)</b> ; 86 T (0.804);  |  |  |
|         |                             | background $\omega$                                            | 0.02453                                                        | 1.00000 | 0.02453   | 1.00000   |          |                             | 91 A (0.676); <b>100 I (0.909)</b> ; |  |  |
|         |                             | foreground $\omega$                                            | 0.02453                                                        | 1.00000 | 999.00000 | 999.00000 |          | <b>8.02**</b>               | <b>107 T (0.985)</b>                 |  |  |
| M1a     | 2                           | $P_0=0.94736; P_1=0.05264; \omega_0=0.02484; \omega_1=1.00000$ |                                                                |         |           |           | -8910.89 | <b><math>P=0.005</math></b> |                                      |  |  |
| ND4     | Branch models               |                                                                |                                                                |         |           |           |          |                             |                                      |  |  |
|         | 1 $\omega$                  | 1                                                              | $\omega_0=0.0283$                                              |         |           |           |          | -7957.65                    | <b>131.3***</b>                      |  |  |

|    |                             |     |                                                                                                                                                                                                               |           |                                           |                                                                                                                                      |  |
|----|-----------------------------|-----|---------------------------------------------------------------------------------------------------------------------------------------------------------------------------------------------------------------|-----------|-------------------------------------------|--------------------------------------------------------------------------------------------------------------------------------------|--|
|    | 2 $\omega$                  | 2   | $\omega_0=0.0271$ ; $\omega_1=999.0000$                                                                                                                                                                       | -7892.00  | <b><math>P&lt;0.001</math></b>            |                                                                                                                                      |  |
|    | 2 $\omega$ ( $\omega_1=1$ ) | 1   | $\omega_0=0.0271$                                                                                                                                                                                             | -7892.05  | 0.10 ( $P=0.75$ )                         |                                                                                                                                      |  |
|    | Free Ratio                  | 221 | $\omega_1=999.0000$ ; N=4.5, S=0                                                                                                                                                                              | -7812.51  |                                           |                                                                                                                                      |  |
|    | Branch-site models          |     |                                                                                                                                                                                                               |           |                                           |                                                                                                                                      |  |
|    | Model A1                    | 4   | site class      0      1      2a      2b<br>proportion      0.88635 0.00000 0.11365 0.00000<br>background $\omega$ 0.02703 1.00000 0.02703 1.00000<br>foreground $\omega$ 0.02703 1.00000 1.00000 1.00000     | -7891.25  | 1.98<br><br>$P=0.16$                      |                                                                                                                                      |  |
|    | Model A                     | 3   | site class      0      1      2a      2b<br>proportion      0.92361 0.00000 0.07639 0.00000<br>background $\omega$ 0.02714 1.00000 0.02714 1.00000<br>foreground $\omega$ 0.02714 1.00000 999.00000 999.00000 | -7890.26  | <b>748.52***</b>                          |                                                                                                                                      |  |
|    | M1a                         | 2   | $P_0=1.00000$ ; $P_1=0.00000$ ; $\omega_0=0.07532$ ; $\omega_1=1.00000$                                                                                                                                       | -8264.52  | <b><math>P&lt;0.001</math></b>            |                                                                                                                                      |  |
| ND | Branch models               |     |                                                                                                                                                                                                               |           |                                           |                                                                                                                                      |  |
|    | 1 $\omega$                  | 1   | $\omega_0=0.0317$                                                                                                                                                                                             | -36799.58 | <b>285.38***</b>                          |                                                                                                                                      |  |
|    | 2 $\omega$                  | 2   | $\omega_0=0.0305$ ; $\omega_1=999.0000$                                                                                                                                                                       | -36656.89 | <b><math>P&lt;0.001</math></b>            |                                                                                                                                      |  |
|    | 2 $\omega$ ( $\omega_1=1$ ) | 1   | $\omega_0=0.0305$                                                                                                                                                                                             | -36657.09 | 0.40 ( $P=0.53$ )                         |                                                                                                                                      |  |
|    | Free Ratio                  | 221 | $\omega_1=28.1184$ ; S= 26.7, S= 0.4                                                                                                                                                                          | -36547.18 |                                           |                                                                                                                                      |  |
|    | Branch-site models          |     |                                                                                                                                                                                                               |           |                                           |                                                                                                                                      |  |
|    | Model A1                    | 4   | site class      0      1      2a      2b<br>proportion      0.76395 0.05524 0.16862 0.01219<br>background $\omega$ 0.02785 1.00000 0.02785 1.00000<br>foreground $\omega$ 0.02785 1.00000 1.00000 1.00000     | -36334.73 | 7.32**<br><br><b><math>P=0.007</math></b> |                                                                                                                                      |  |
|    | Model A                     | 3   | site class      0      1      2a      2b<br>proportion      0.89218 0.06482 0.04008 0.00291                                                                                                                   | -36331.07 |                                           | 37 I( 0.831); 40 S (0.779); 41 A (0.506); 52 F (0.717); <b>67 V (0.916)</b> ; 77 L (0.708); <b>78 M (0.973)</b> ; 85 Y (0.636);138 N |  |

|                             |                             |               |                                                                                                                                                                                      |           |                                                  |                                                                                                                                                                                                                            |
|-----------------------------|-----------------------------|---------------|--------------------------------------------------------------------------------------------------------------------------------------------------------------------------------------|-----------|--------------------------------------------------|----------------------------------------------------------------------------------------------------------------------------------------------------------------------------------------------------------------------------|
|                             |                             |               | background $\omega$ 0.02781 1.00000 0.02781 1.00000<br>foreground $\omega$ 0.02781 1.00000 999.00000 999.00000                                                                       |           |                                                  | (0.890); 178 L (0.795); <b>191 S (1.000)</b> ; 249 L (0.539); <b>385 T (0.988)</b> ; 391 T (0.847); <b>392 T (0.983)</b> ; 421 H (0.590); <b>435 S (0.954)</b> ; <b>439 L (0.905)</b> <b>449 I (0.954)</b> ; 458 L (0.833) |
|                             | M1a                         | 2             | $P_0=0.93315$ ; $P_1=0.06685$ ; $\omega_0=0.02803$ ; $\omega_1=1.00000$                                                                                                              | -36344.72 | <b>27.3***</b><br><b><math>P&lt;0.001</math></b> |                                                                                                                                                                                                                            |
| ND5                         | Branch models               |               |                                                                                                                                                                                      |           |                                                  |                                                                                                                                                                                                                            |
|                             | 1 $\omega$                  | 1             | $\omega_0=0.0465$                                                                                                                                                                    | -48917.23 | <b>397.18***</b>                                 |                                                                                                                                                                                                                            |
|                             | 2 $\omega$                  | 2             | $\omega_0=0.0455$ ; $\omega_1=999.0000$                                                                                                                                              | -48718.64 | <b><math>P&lt;0.001</math></b>                   |                                                                                                                                                                                                                            |
|                             | 2 $\omega$ ( $\omega_1=1$ ) | 1             | $\omega_0=0.0455$                                                                                                                                                                    | -48718.71 | 0.14 ( $P=0.71$ )                                |                                                                                                                                                                                                                            |
|                             | Free Ratio                  | 221           | $\omega_1=194.0421$ ; N=9.6, S=0                                                                                                                                                     | -48551.23 |                                                  |                                                                                                                                                                                                                            |
|                             | Branch-site models          |               |                                                                                                                                                                                      |           |                                                  |                                                                                                                                                                                                                            |
|                             | Model A1                    | 4             | site class 0 1 2a 2b<br>proportion 0.00002 0.00000 0.90891 0.09107<br>background $\omega$ 0.04177 1.00000 0.04177 1.00000<br>foreground $\omega$ 0.04177 1.00000 1.00000 1.00000     | -48202.88 | 1.78<br>$P=0.18$                                 |                                                                                                                                                                                                                            |
|                             | Model A                     | 3             | site class 0 1 2a 2b<br>proportion 0.88567 0.08877 0.02323 0.00233<br>background $\omega$ 0.04176 1.00000 0.04176 1.00000<br>foreground $\omega$ 0.04176 1.00000 999.00000 999.00000 | -48201.99 | <b>5.28*</b>                                     | 14 T (0.514); 43 S (0.552); 45 I (0.562);<br>356 F (0.645); 481 L (0.577); 488 I (0.609)                                                                                                                                   |
|                             | M1a                         | 2             | $P_0=0.90902$ ; $P_1=0.09098$ ; $\omega_0=0.04187$ ; $\omega_1=1.00000$                                                                                                              | -48204.63 | <b><math>P=0.022</math></b>                      |                                                                                                                                                                                                                            |
|                             | ND6                         | Branch models |                                                                                                                                                                                      |           |                                                  |                                                                                                                                                                                                                            |
| 1 $\omega$                  |                             | 1             | $\omega_0=0.0328$                                                                                                                                                                    | -13172.73 | <b>225.88***</b>                                 |                                                                                                                                                                                                                            |
| 2 $\omega$                  |                             | 2             | $\omega_0=0.0305$ ; $\omega_1=999.0000$                                                                                                                                              | -13059.79 | <b><math>P&lt;0.001</math></b>                   |                                                                                                                                                                                                                            |
| 2 $\omega$ ( $\omega_1=1$ ) |                             | 1             | $\omega_0=0.0305$                                                                                                                                                                    | -13059.83 | 0.08 ( $P=0.78$ )                                |                                                                                                                                                                                                                            |
| Free Ratio                  |                             | 221           | $\omega_1=0.1976$ ; N=14.5, S=20.1                                                                                                                                                   | -12936.87 |                                                  |                                                                                                                                                                                                                            |
| Branch-site models          |                             |               |                                                                                                                                                                                      |           |                                                  |                                                                                                                                                                                                                            |

|         |                             |                                                                         |                                                                         |         |           |           |           |           |                                     |                                                    |
|---------|-----------------------------|-------------------------------------------------------------------------|-------------------------------------------------------------------------|---------|-----------|-----------|-----------|-----------|-------------------------------------|----------------------------------------------------|
|         | Model A1                    | 4                                                                       | site class                                                              | 0       | 1         | 2a        | 2b        | -13011.16 | 1.46                                |                                                    |
|         |                             |                                                                         | proportion                                                              | 0.87130 | 0.02236   | 0.10367   | 0.00266   |           | $P=0.23$                            |                                                    |
|         |                             |                                                                         | background $\omega$                                                     | 0.03102 | 1.00000   | 0.03102   | 1.00000   |           |                                     |                                                    |
|         |                             |                                                                         | foreground $\omega$                                                     | 0.03102 | 1.00000   | 1.00000   | 1.00000   |           |                                     |                                                    |
|         | Model A                     | 3                                                                       | site class                                                              | 0       | 1         | 2a        | 2b        | -13010.43 | 7.76**                              | 45 V ( 0.708); 113 L (0.601); <b>128 M (0.981)</b> |
|         |                             |                                                                         | proportion                                                              | 0.90119 | 0.02308   | 0.07384   | 0.00189   |           |                                     | 136 G (0.647)                                      |
|         |                             |                                                                         | background $\omega$                                                     | 0.03104 | 1.00000   | 0.03104   | 1.00000   |           |                                     |                                                    |
|         |                             |                                                                         | foreground $\omega$                                                     | 0.03104 | 1.00000   | 5.33755   | 5.33755   |           |                                     |                                                    |
|         | M1a                         | 2                                                                       | $P_0=0.97503$ ; $P_1=0.02497$ ; $\omega_0=0.03120$ ; $\omega_1=1.00000$ |         |           |           |           | -13014.31 | $P=0.005$                           |                                                    |
| Cox1    | Branch models               |                                                                         |                                                                         |         |           |           |           |           |                                     |                                                    |
|         | 1 $\omega$                  | 1                                                                       | $\omega_0=0.0064$                                                       |         |           |           |           | -31040.22 |                                     |                                                    |
|         | 2 $\omega$                  | 2                                                                       | $\omega_0=0.0063$ ; $\omega_1=0.0503$                                   |         |           |           |           | -30970.15 |                                     |                                                    |
|         | 2 $\omega$ ( $\omega_1=1$ ) | 1                                                                       | $\omega_0=0.0063$                                                       |         |           |           |           | -30970.45 |                                     |                                                    |
|         | Free Ratio                  | 221                                                                     | $\omega_1=14.4642$ ; $N=4.8$ , $S=0.1$                                  |         |           |           |           | -30834.16 |                                     |                                                    |
|         | Branch-site models          |                                                                         |                                                                         |         |           |           |           |           |                                     |                                                    |
|         | Model A1                    | 4                                                                       | site class                                                              | 0       | 1         | 2a        | 2b        | -30826.19 | 6.66**                              |                                                    |
|         |                             |                                                                         | proportion                                                              | 0.97958 | 0.00578   | 0.01455   | 0.00009   |           | $P=0.0099$                          |                                                    |
|         |                             | background $\omega$                                                     | 0.00536                                                                 | 1.00000 | 0.00536   | 1.00000   |           |           |                                     |                                                    |
|         |                             | foreground $\omega$                                                     | 0.00536                                                                 | 1.00000 | 1.00000   | 1.00000   |           |           |                                     |                                                    |
| Model A | 3                           | site class                                                              | 0                                                                       | 1       | 2a        | 2b        | -30822.86 | 16.14***  | 176 M (0.739); <b>415 T (0.986)</b> |                                                    |
|         |                             | proportion                                                              | 0.98989                                                                 | 0.00584 | 0.00424   | 0.00003   |           |           |                                     |                                                    |
|         |                             | background $\omega$                                                     | 0.00537                                                                 | 1.00000 | 0.00537   | 1.00000   |           |           |                                     |                                                    |
|         |                             | foreground $\omega$                                                     | 0.00537                                                                 | 1.00000 | 999.00000 | 999.00000 |           |           |                                     |                                                    |
| M1a     | 2                           | $P_0=0.99413$ ; $P_1=0.00587$ ; $\omega_0=0.00540$ ; $\omega_1=1.00000$ |                                                                         |         |           |           | -30830.93 | $P<0.001$ |                                     |                                                    |
| ○ ○     | Branch models               |                                                                         |                                                                         |         |           |           |           |           |                                     |                                                    |

|         |                             |                                                                |                                      |         |           |           |                   |                   |                                |                     |
|---------|-----------------------------|----------------------------------------------------------------|--------------------------------------|---------|-----------|-----------|-------------------|-------------------|--------------------------------|---------------------|
|         | 1 $\omega$                  | 1                                                              | $\omega_0=0.0141$                    |         | -14353.39 |           |                   |                   |                                |                     |
|         | 2 $\omega$                  | 2                                                              | $\omega_0=0.0131; \omega_1=0.0578$   |         | -14240.56 |           |                   |                   |                                |                     |
|         | 2 $\omega$ ( $\omega_1=1$ ) | 1                                                              | $\omega_0=0.0130$                    |         | -14241.14 |           |                   |                   |                                |                     |
|         | Free Ratio                  | 221                                                            | $\omega_1=0.0329; N=2.1, S=22.8$     |         | -14122.49 |           |                   |                   |                                |                     |
|         | Branch-site models          |                                                                |                                      |         |           |           |                   |                   |                                |                     |
|         | Model A1                    | 4                                                              | site class                           | 0       | 1         | 2a        | 2b                | -14184.49         | <b>4.18*</b><br><b>P=0.041</b> | <b>49 K (0.992)</b> |
|         |                             |                                                                | proportion                           | 0.96481 | 0.00858   | 0.02638   | 0.00023           |                   |                                |                     |
|         |                             | background $\omega$                                            | 0.01245                              | 1.00000 | 0.01245   | 1.00000   |                   |                   |                                |                     |
|         |                             | foreground $\omega$                                            | 0.01245                              | 1.00000 | 1.00000   | 1.00000   |                   |                   |                                |                     |
| Model A | 3                           | site class                                                     | 0                                    | 1       | 2a        | 2b        | -14182.40         | <b>11.64***</b>   |                                |                     |
|         |                             | proportion                                                     | 0.98525                              | 0.00876 | 0.00594   | 0.00005   |                   |                   |                                |                     |
|         |                             | background $\omega$                                            | 0.01244                              | 1.00000 | 0.01244   | 1.00000   |                   |                   |                                |                     |
|         |                             | foreground $\omega$                                            | 0.01244                              | 1.00000 | 38.62308  | 38.62308  |                   |                   |                                |                     |
| M1a     | 2                           | $P_0=0.99119; P_1=0.00881; \omega_0=0.01254; \omega_1=1.00000$ |                                      |         |           | -14188.22 |                   | <b>P&lt;0.001</b> |                                |                     |
| CoxIII  | Branch models               |                                                                |                                      |         |           |           |                   |                   |                                |                     |
|         | 1 $\omega$                  | 1                                                              | $\omega_0=0.0179$                    |         | -17154.04 |           | <b>158.72***</b>  |                   |                                |                     |
|         | 2 $\omega$                  | 2                                                              | $\omega_0=0.0176; \omega_1=705.5144$ |         | -17074.68 |           | <b>P&lt;0.001</b> |                   |                                |                     |
|         | 2 $\omega$ ( $\omega_1=1$ ) | 1                                                              | $\omega_0=0.0176$                    |         | -17074.73 |           | 0.10 ( $P=0.75$ ) |                   |                                |                     |
|         | Free Ratio                  | 221                                                            | $\omega_1=56.8211; N=1.8, S=0.0$     |         |           |           | -16969.69         |                   |                                |                     |
|         | Branch-site models          |                                                                |                                      |         |           |           |                   |                   |                                |                     |
|         | Model A1                    | 4                                                              | site class                           | 0       | 1         | 2a        | 2b                | -16875.76         | 0.1<br><b>P=0.75</b>           |                     |
|         |                             |                                                                | proportion                           | 0.00000 | 0.00000   | 0.96313   | 0.03687           |                   |                                |                     |
|         |                             | background $\omega$                                            | 0.01326                              | 1.00000 | 0.01326   | 1.00000   |                   |                   |                                |                     |
|         |                             | foreground $\omega$                                            | 0.01326                              | 1.00000 | 1.00000   | 1.00000   |                   |                   |                                |                     |
| Model A | 3                           | site class                                                     | 0                                    | 1       | 2a        | 2b        | -16875.71         |                   |                                |                     |



|         |                             |                                                                |                                                                |         |           |           |          |           |                |                     |  |  |
|---------|-----------------------------|----------------------------------------------------------------|----------------------------------------------------------------|---------|-----------|-----------|----------|-----------|----------------|---------------------|--|--|
|         |                             |                                                                | proportion                                                     | 0.00000 | 0.00000   | 0.96312   | 0.03688  |           |                |                     |  |  |
|         |                             |                                                                | background $\omega$                                            | 0.01327 | 1.00000   | 0.01327   | 1.00000  |           |                |                     |  |  |
|         |                             |                                                                | foreground $\omega$                                            | 0.01327 | 1.00000   | 34.12213  | 34.12213 |           |                | <b>5.26*</b>        |  |  |
|         | M1a                         | 2                                                              | $P_0=0.96353; P_1=0.03647; \omega_0=0.01334; \omega_1=1.00000$ |         |           |           |          | -16878.34 |                | <b>P=0.022</b>      |  |  |
| ATP8    | Branch models               |                                                                |                                                                |         |           |           |          |           |                |                     |  |  |
|         | 1 $\omega$                  | 1                                                              | $\omega_0=0.2325$                                              |         |           |           |          | -5879.56  |                |                     |  |  |
|         | 2 $\omega$                  | 2                                                              | $\omega_0=0.2204; \omega_1=0.7325$                             |         |           |           |          | -5800.47  |                |                     |  |  |
|         | 2 $\omega$ ( $\omega_1=1$ ) | 1                                                              | $\omega_0=0.2203$                                              |         |           |           |          | -5800.54  |                |                     |  |  |
|         | Free Ratio                  | 221                                                            | $\omega_1=0.7496; N=13.9, S=7.0$                               |         |           |           |          | -5716.70  |                |                     |  |  |
|         | Branch-site models          |                                                                |                                                                |         |           |           |          |           |                |                     |  |  |
|         | Model A1                    | 4                                                              | site class                                                     | 0       | 1         | 2a        | 2b       | -5502.44  |                | <b>4.2*</b>         |  |  |
|         |                             |                                                                | proportion                                                     | 0.59033 | 0.34754   | 0.03910   | 0.02302  |           |                | <b>P=0.040</b>      |  |  |
|         |                             |                                                                | background $\omega$                                            | 0.07408 | 1.00000   | 0.07408   | 1.00000  |           |                |                     |  |  |
|         |                             |                                                                | foreground $\omega$                                            | 0.07408 | 1.00000   | 1.00000   | 1.00000  |           |                |                     |  |  |
| Model A | 3                           | site class                                                     | 0                                                              | 1       | 2a        | 2b        | -5500.34 |           |                | <b>24 F (0.988)</b> |  |  |
|         |                             | proportion                                                     | 0.60365                                                        | 0.35539 | 0.02578   | 0.01518   |          |           |                |                     |  |  |
|         |                             | background $\omega$                                            | 0.07390                                                        | 1.00000 | 0.07390   | 1.00000   |          |           |                |                     |  |  |
|         |                             | foreground $\omega$                                            | 0.07390                                                        | 1.00000 | 557.13406 | 557.13406 |          |           | <b>6.04*</b>   |                     |  |  |
| M1a     | 2                           | $P_0=0.62947; P_1=0.37053; \omega_0=0.07525; \omega_1=1.00000$ |                                                                |         |           |           | -5503.36 |           | <b>P=0.014</b> |                     |  |  |
| ATP6    | Branch models               |                                                                |                                                                |         |           |           |          |           |                |                     |  |  |
|         | 1 $\omega$                  | 1                                                              | $\omega_0=0.0358$                                              |         |           |           |          | -17071.46 |                |                     |  |  |
|         | 2 $\omega$                  | 2                                                              | $\omega_0=0.0362; \omega_1=0.0738$                             |         |           |           |          | -16968.18 |                |                     |  |  |
|         | 2 $\omega$ ( $\omega_1=1$ ) | 1                                                              | $\omega_0=0.0361$                                              |         |           |           |          | -16969.33 |                |                     |  |  |
|         | Free Ratio                  | 221                                                            | $\omega_1=0.0837; N=6.0, S=29.0$                               |         |           |           |          | -16807.45 |                |                     |  |  |
|         | Branch-site models          |                                                                |                                                                |         |           |           |          |           |                |                     |  |  |

|                  |                             |                                                                |                                                                |         |          |          |           |                                |                                                                                                                                 |                                                                   |  |
|------------------|-----------------------------|----------------------------------------------------------------|----------------------------------------------------------------|---------|----------|----------|-----------|--------------------------------|---------------------------------------------------------------------------------------------------------------------------------|-------------------------------------------------------------------|--|
|                  | Model A1                    | 4                                                              | site class                                                     | 0       | 1        | 2a       | 2b        | -16831.90                      | 2.42                                                                                                                            |                                                                   |  |
|                  |                             |                                                                | proportion                                                     | 0.89946 | 0.03303  | 0.06512  | 0.00239   |                                | $P=0.12$                                                                                                                        |                                                                   |  |
|                  |                             |                                                                | background $\omega$                                            | 0.03307 | 1.00000  | 0.03307  | 1.00000   |                                |                                                                                                                                 |                                                                   |  |
|                  |                             |                                                                | foreground $\omega$                                            | 0.03307 | 1.00000  | 1.00000  | 1.00000   |                                |                                                                                                                                 |                                                                   |  |
|                  | Model A                     | 3                                                              | site class                                                     | 0       | 1        | 2a       | 2b        | -16830.69                      |                                                                                                                                 | 34 P (0.646); 44 A (0.650);<br>51 Q (0.674); <b>115 T (0.991)</b> |  |
|                  |                             |                                                                | proportion                                                     | 0.94373 | 0.03465  | 0.02085  | 0.00077   |                                | <b>8.42**</b>                                                                                                                   |                                                                   |  |
|                  |                             |                                                                | background $\omega$                                            | 0.03308 | 1.00000  | 0.03308  | 1.00000   |                                |                                                                                                                                 |                                                                   |  |
|                  |                             |                                                                | foreground $\omega$                                            | 0.03308 | 1.00000  | 11.63086 | 11.63086  |                                |                                                                                                                                 |                                                                   |  |
|                  | M1a                         | 2                                                              | $P_0=0.96461; P_1=0.03539; \omega_0=0.03322; \omega_1=1.00000$ |         |          |          |           | -16834.90                      | <b><math>P=0.0037</math></b>                                                                                                    |                                                                   |  |
| C <sub>y</sub> B | Branch models               |                                                                |                                                                |         |          |          |           |                                |                                                                                                                                 |                                                                   |  |
|                  | 1 $\omega$                  | 1                                                              | $\omega_0=0.0271$                                              |         |          |          |           | -26338.68                      |                                                                                                                                 |                                                                   |  |
|                  | 2 $\omega$                  | 2                                                              | $\omega_0=0.0268; \omega_1=0.1563$                             |         |          |          |           | -26228.32                      |                                                                                                                                 |                                                                   |  |
|                  | 2 $\omega$ ( $\omega_1=1$ ) | 1                                                              | $\omega_0=0.0267$                                              |         |          |          |           | -26229.42                      |                                                                                                                                 |                                                                   |  |
|                  | Free Ratio                  | 221                                                            | $\omega_1=0.1428; N=22.2, S=50.9$                              |         |          |          |           | -26089.06                      |                                                                                                                                 |                                                                   |  |
|                  | Branch-site models          |                                                                |                                                                |         |          |          |           |                                |                                                                                                                                 |                                                                   |  |
|                  | Model A1                    | 4                                                              | site class                                                     | 0       | 1        | 2a       | 2b        | -26131.16                      | <b>4.02*</b>                                                                                                                    |                                                                   |  |
|                  |                             |                                                                | proportion                                                     | 0.90986 | 0.02508  | 0.06332  | 0.00175   |                                | <b><math>P=0.045</math></b>                                                                                                     |                                                                   |  |
|                  |                             |                                                                | background $\omega$                                            | 0.02503 | 1.00000  | 0.02503  | 1.00000   |                                |                                                                                                                                 |                                                                   |  |
|                  |                             |                                                                | foreground $\omega$                                            | 0.02503 | 1.00000  | 1.00000  | 1.00000   |                                |                                                                                                                                 |                                                                   |  |
| Model A          | 3                           | site class                                                     | 0                                                              | 1       | 2a       | 2b       | -26129.15 |                                | <b>42 I (0.976); 64 S (0.962); 79 I (0.835);</b><br><b>184 I (0.557); 368 V (0.514); 372 I (0.730);</b><br><b>375 K (0.596)</b> |                                                                   |  |
|                  |                             | proportion                                                     | 0.94607                                                        | 0.02610 | 0.02708  | 0.00075  |           | <b>13.78***</b>                |                                                                                                                                 |                                                                   |  |
|                  |                             | background $\omega$                                            | 0.02506                                                        | 1.00000 | 0.02506  | 1.00000  |           |                                |                                                                                                                                 |                                                                   |  |
|                  |                             | foreground $\omega$                                            | 0.02506                                                        | 1.00000 | 10.55724 | 10.55724 |           |                                |                                                                                                                                 |                                                                   |  |
| M1a              | 2                           | $P_0=0.97321; P_1=0.02679; \omega_0=0.02519; \omega_1=1.00000$ |                                                                |         |          |          | -26136.04 | <b><math>P&lt;0.001</math></b> |                                                                                                                                 |                                                                   |  |

Tab. S3: List of nuclear-encoded OXPHOS genes

| Gene         | LnL(branch bat)     | LnL(branch bat1)    | LnL(branch rodent) | LnL(branch rodent1) | M1a          | Flying fox             | Little brown bat       | cow                    | horse                  | dog                    | mouse                  | rat                    | human               | chimpanzee             | macaque               |
|--------------|---------------------|---------------------|--------------------|---------------------|--------------|------------------------|------------------------|------------------------|------------------------|------------------------|------------------------|------------------------|---------------------|------------------------|-----------------------|
| ATP12A       | -15424.52439        | -15424.52439        | -15423.78712       | -15423.78712        | -15424.52439 | ENSPVAG00<br>000013016 | ENSMLUG00<br>000012378 | ENSBTAG00<br>000014486 | ENSECAG00<br>000017460 | ENSCAFG00<br>000007432 | ENSMUSG00<br>000022229 | ENSRNOG00<br>000020685 | ENSG000000<br>75673 | ENSPTRG00<br>000005712 | ENSMUG0<br>0000022608 |
| ATP4A        | -5598.849376        | -5598.849376        | -5598.849376       | -5598.849376        | -5598.849376 | ENSPVAG00<br>000012169 | ENSMLUG00<br>000016393 | ENSBTAG00<br>000008777 | ENSECAG00<br>000013121 | ENSCAFG00<br>000006951 | ENSMUSG00<br>000005553 | ENSRNOG00<br>000020985 | ENSG000001<br>05675 | ENSPTRG00<br>000010850 | ENSMUG0<br>0000000845 |
| <b>ATP4B</b> | <b>-3385.81515</b>  | <b>-3389.720457</b> | -3389.208905       | -3389.215514        | -3390.902838 | ENSPVAG00<br>000013414 | ENSMLUG00<br>000003617 | ENSBTAG00<br>000019961 | ENSECAG00<br>000020199 | ENSCAFG00<br>000006390 | ENSMUSG00<br>000031449 | ENSRNOG00<br>000018543 | ENSG000001<br>86009 | ENSPTRG00<br>000006063 | ENSMUG0<br>0000007425 |
| ATP5A1       | -4639.900343        | -4639.900343        | -4639.900343       | -4639.900343        | -4639.900343 | ENSPVAG00<br>000012113 | ENSMLUG00<br>000009856 | ENSBTAG00<br>000002507 | ENSECAG00<br>000021561 | ENSCAFG00<br>000007869 | ENSMUSG00<br>000025428 | ENSRNOG00<br>000017032 | ENSG000001<br>52234 | ENSPTRG00<br>000009991 | ENSMUG0<br>0000003570 |
| <b>ATP5B</b> | <b>-4374.458129</b> | <b>-4615.808389</b> | -4615.808389       | -4615.808389        | -4615.808389 | ENSPVAG00<br>000007625 | ENSMLUG00<br>000016195 | ENSBTAG00<br>000013315 | ENSECAG00<br>000022627 | ENSCAFG00<br>000000136 | ENSMUSG00<br>000025393 | ENSRNOG00<br>000002840 | ENSG000001<br>10955 | ENSPTRG00<br>000005107 | ENSMUG0<br>0000030356 |
| ATP5C1       | -3058.720119        | -3058.720119        | -3059.178917       | -3059.178917        | -3059.26294  | ENSPVAG00<br>000006512 | ENSMLUG00<br>000002279 | ENSBTAG00<br>000002836 | ENSECAG00<br>000024684 | ENSCAFG00<br>000005022 | ENSMUSG00<br>000025782 | ENSRNOG00<br>000019223 | ENSG000001<br>65629 | ENSPTRG00<br>000002277 | ENSMUG0<br>0000009207 |
| ATP5D        | -2019.974621        | -2019.974621        | -2019.872646       | -2019.919162        | -2019.974621 | ENSPVAG00<br>000005633 | ENSMLUG00<br>000015004 | ENSBTAG00<br>000000550 | ENSECAG00<br>000012169 | ENSCAFG00<br>000019536 | ENSMUSG00<br>000003072 | ENSRNOG00<br>000014625 | ENSG000000<br>99624 | ENSPTRG00<br>000010190 | ENSMUG0<br>0000007091 |
| ATP5F1       | -2797.59142         | -2797.598746        | -2797.289055       | -2797.539955        | -2797.599389 | ENSPVAG00<br>000010604 | ENSMLUG00<br>000012417 | ENSBTAG00<br>000006441 | ENSECAG00<br>000018599 | ENSCAFG00<br>000019738 | ENSMUSG00<br>000000563 | ENSRNOG00<br>000016000 | ENSG000001<br>16459 | ENSPTRG00<br>000001099 | ENSMUG0<br>0000003313 |
| ATP5G1       | -1186.009406        | -1186.009406        | -1184.609631       | -1185.524967        | -1186.009406 | ENSPVAG00<br>000004939 | ENSMLUG00<br>000011738 | ENSBTAG00<br>000018339 | ENSECAG00<br>000019908 | ENSCAFG00<br>000006490 | ENSMUSG00<br>000006057 | ENSRNOG00<br>000012129 | ENSG000001<br>59199 | ENSPTRG00<br>000009364 | ENSMUG0<br>0000013395 |
| ATP5G2       | -1361.304316        | -1361.537278        | -1361.614485       | -1361.614485        | -1361.614485 | ENSPVAG00<br>000012291 | ENSMLUG00<br>000011860 | ENSBTAG00<br>000005735 | ENSECAG00<br>000023021 | ENSCAFG00<br>000001530 | ENSMUSG00<br>000062683 | ENSRNOG00<br>000015320 | ENSG000001<br>35390 | ENSPTRG00<br>000005023 | ENSMUG0<br>0000016241 |
| ATP5G3       | -974.081327         | -974.081327         | -974.081327        | -974.081327         | -974.081327  | ENSPVAG00<br>000008355 | ENSMLUG00<br>000012822 | ENSBTAG00<br>000002944 | ENSECAG00<br>000008514 | ENSCAFG00<br>000013366 | ENSMUSG00<br>000018770 | ENSRNOG00<br>000001596 | ENSG000001<br>54518 | ENSPTRG00<br>000012661 | ENSMUG0<br>0000003954 |

|              |                     |                    |              |              |              |                        |                       |                        |                        |                        |                        |                        |                     |                        |                        |
|--------------|---------------------|--------------------|--------------|--------------|--------------|------------------------|-----------------------|------------------------|------------------------|------------------------|------------------------|------------------------|---------------------|------------------------|------------------------|
| ATP5H        | -1577.914921        | -1577.914921       | -1577.344949 | -1578.234449 | -1578.26396  | /                      | ENSMUG00<br>000010620 | ENSBTAG00<br>000021227 | ENSECAG00<br>000009487 | ENSCAFG00<br>000004703 | ENSMUSG00<br>000034566 | ENSRNOG00<br>000003626 | ENSG000001<br>67863 | ENSPTRG00<br>000009628 | ENSMUG00<br>0000011647 |
| ATP5I        | -884.180157         | -884.180157        | -884.180157  | -884.180157  | -884.180157  | ENSPVAG00<br>000008778 | /                     | ENSBTAG00<br>000017496 | ENSECAG00<br>000017292 | ENSCAFG00<br>000023527 | ENSMUSG00<br>000050856 | ENSRNOG00<br>000000064 | ENSG000001<br>69020 | ENSPPYG00<br>000014505 | /                      |
| ATP5J        | -1311.575013        | -1311.575013       | -1310.299167 | -1310.299167 | -1311.488204 | ENSPVAG00<br>000011310 | ENSMUG00<br>000015988 | ENSBTAG00<br>000000605 | ENSECAG00<br>000017858 | ENSCAFG00<br>000004941 | ENSMUSG00<br>000022890 | ENSRNOG00<br>000001551 | ENSG000001<br>54723 | ENSPTRG00<br>000013809 | ENSMUG00<br>000008725  |
| <b>ATP5L</b> | <b>-1042.958319</b> | <b>-1044.05988</b> | -1043.328271 | -1043.668507 | -1044.2238   | ENSPVAG00<br>000006243 | ENSMUG00<br>000014080 | ENSBTAG00<br>000007332 | ENSECAG00<br>000023715 | ENSCAFG00<br>000000377 | ENSMUSG00<br>000038717 | ENSRNOG00<br>000027113 | ENSG000001<br>67283 | ENSPTRG00<br>000004342 | ENSMUG00<br>000009632  |
| ATP5O        | -2695.0144          | -2695.0144         | -2694.30307  | -2694.382967 | -2695.0144   | ENSPVAG00<br>000011191 | ENSMUG00<br>000008224 | ENSBTAG00<br>000018278 | ENSECAG00<br>000009059 | ENSCAFG00<br>000009541 | ENSMUSG00<br>000022956 | ENSRNOG00<br>000001991 | ENSG000001<br>59186 | ENSPTRG00<br>000013876 | ENSMUG00<br>0000015504 |
| ATP6AP1      | -5412.326234        | -5412.326234       | -5412.326234 | -5412.326234 | -5412.326234 | /                      | ENSMUG00<br>000003493 | ENSBTAG00<br>000012117 | ENSECAG00<br>000014216 | ENSCAFG00<br>000019582 | ENSMUSG00<br>000019087 | ENSRNOG00<br>000037244 | ENSG000000<br>71553 | ENSPTRG00<br>000022435 | ENSMUG00<br>000005501  |
| ATP6V0A1     | -7545.729603        | -7545.668151       | -7543.504315 | -7544.702519 | -7545.729616 | ENSPVAG00<br>000016552 | ENSMUG00<br>000016640 | ENSBTAG00<br>000019218 | ENSECAG00<br>000016326 | ENSCAFG00<br>000015017 | ENSMUSG00<br>000019302 | ENSRNOG00<br>000036814 | ENSG000000<br>33627 | ENSPTRG00<br>000009202 | ENSMUG00<br>0000022644 |
| ATP6V0A2     | -9626.217833        | -9626.217831       | -9626.217828 | -9626.217828 | -9626.217826 | ENSPVAG00<br>000014752 | ENSMUG00<br>000001283 | ENSBTAG00<br>000007272 | ENSECAG00<br>000024587 | ENSCAFG00<br>000007234 | ENSMUSG00<br>000038023 | ENSRNOG00<br>000001019 | ENSG000001<br>85344 | ENSPTRG00<br>000005607 | ENSMUG00<br>000006546  |
| ATP6V0A4     | -10132.72233        | -10132.72233       | -10133.54197 | -10133.542   | -10133.54211 | ENSPVAG00<br>000011743 | ENSMUG00<br>000008209 | ENSBTAG00<br>000004263 | ENSECAG00<br>000016114 | ENSCAFG00<br>000004236 | ENSMUSG00<br>000038600 | ENSRNOG00<br>000013428 | ENSG000001<br>05929 | ENSPTRG00<br>000019746 | ENSMUG00<br>000006547  |
| ATP6V0B      | -1515.272177        | -1515.272177       | -1514.85527  | -1515.196499 | -1515.272177 | ENSPVAG00<br>000009506 | /                     | ENSBTAG00<br>000018889 | ENSECAG00<br>000024290 | ENSCAFG00<br>000004854 | ENSMUSG00<br>000033379 | ENSRNOG00<br>000019655 | ENSG000001<br>17410 | ENSPTRG00<br>000006648 | ENSMUG00<br>0000015154 |
| ATP6V0C      | -1413.706729        | -1414.298672       | -1411.933998 | -1412.160835 | -1414.302449 | ENSPVAG00<br>000005116 | /                     | ENSBTAG00<br>000026428 | /                      | ENSCAFG00<br>000019363 | ENSMUSG00<br>000024121 | ENSRNOG00<br>000006542 | ENSG000001<br>85883 | ENSPTRG00<br>000007653 | ENSMUG00<br>000005679  |
| ATP6V0D1     | -3829.718318        | -3829.718318       | -3829.718318 | -3829.743751 | -3829.718318 | ENSPVAG00<br>000008207 | ENSMUG00<br>000005187 | ENSBTAG00<br>000014553 | ENSECAG00<br>000015817 | ENSCAFG00<br>000020360 | ENSMUSG00<br>000013160 | ENSRNOG00<br>000017235 | ENSG000001<br>59720 | ENSPTRG00<br>000008231 | ENSMUG00<br>0000029105 |
| ATP6V0D2     | -3995.847902        | -3995.847902       | -3995.847902 | -3995.847902 | -3995.847902 | ENSPVAG00<br>000013452 | ENSMUG00<br>000014748 | ENSBTAG00<br>000021092 | ENSECAG00<br>000015484 | ENSCAFG00<br>000008749 | ENSMUSG00<br>000028238 | ENSRNOG00<br>000006926 | ENSG000001<br>47614 | ENSPTRG00<br>000020393 | ENSMUG00<br>0000001618 |

|          |              |              |              |              |              |                        |                        |                        |                        |                        |                        |                        |                     |                        |                       |
|----------|--------------|--------------|--------------|--------------|--------------|------------------------|------------------------|------------------------|------------------------|------------------------|------------------------|------------------------|---------------------|------------------------|-----------------------|
| ATP6V0E1 | -670.389314  | -670.389314  | -670.389314  | -670.389314  | -670.389314  | ENSPVAG00<br>000003251 | ENSMLUG00<br>000009804 | ENSBTAG00<br>000015100 | ENSECAG00<br>000000669 | ENSCAFG00<br>000016617 | ENSMUSG00<br>000015575 | ENSRNOG00<br>000003269 | ENSG000001<br>13732 | ENSPTRG00<br>000017538 | ENSMUG0<br>0000013825 |
| ATP6V1A  | -4917.631431 | -4917.63143  | -4918.177545 | -4918.176846 | -4918.176845 | ENSPVAG00<br>000006154 | ENSMLUG00<br>000003808 | ENSBTAG00<br>000002703 | ENSECAG00<br>000021773 | ENSCAFG00<br>000010711 | ENSMUSG00<br>000052459 | ENSRNOG00<br>000001992 | ENSG000001<br>14573 | ENSPTRG00<br>000015235 | ENSMUG0<br>0000007366 |
| ATP6V1B1 | -6435.115714 | -6435.115715 | -6435.115716 | -6435.115715 | -6435.115714 | ENSPVAG00<br>000002904 | ENSMLUG00<br>000007334 | ENSBTAG00<br>000010620 | ENSECAG00<br>000022593 | ENSCAFG00<br>000003442 | ENSMUSG00<br>000006269 | ENSRNOG00<br>000013573 | ENSG000001<br>16039 | ENSPTRG00<br>000012038 | ENSMUG0<br>0000002090 |
| ATP6V1B2 | -4273.547954 | -4273.547954 | -4274.528265 | -4274.528255 | -4274.528255 | ENSPVAG00<br>000010594 | ENSMLUG00<br>000008957 | ENSBTAG00<br>000018646 | ENSECAG00<br>000016500 | ENSCAFG00<br>000010095 | ENSMUSG00<br>000006273 | ENSRNOG00<br>000011891 | ENSG000001<br>47416 | ENSPTRG00<br>000020040 | ENSMUG0<br>0000020000 |
| ATP6V1C1 | -2920.976519 | -2920.97652  | -2920.976519 | -2920.976519 | -2920.976519 | ENSPVAG00<br>000001668 | ENSMLUG00<br>000003252 | ENSBTAG00<br>000013513 | ENSECAG00<br>000024964 | ENSCAFG00<br>000000649 | ENSMUSG00<br>000022295 | ENSRNOG00<br>000004846 | ENSG000001<br>55097 | ENSPTRG00<br>000020486 | ENSMUG0<br>0000001078 |
| ATP6V1C2 | -4433.67667  | -4433.67667  | -4433.554188 | -4433.67667  | -4433.67667  | ENSPVAG00<br>000006345 | ENSMLUG00<br>000012207 | ENSBTAG00<br>000001927 | ENSECAG00<br>000010555 | ENSCAFG00<br>000003464 | ENSMUSG00<br>000020566 | /                      | ENSG000001<br>43882 | ENSPTRG00<br>000011652 | ENSMUG0<br>0000010320 |
| ATP6V1D  | -1940.661251 | -1940.661251 | -1940.661251 | -1940.661266 | -1940.661251 | ENSPVAG00<br>000003039 | ENSMLUG00<br>000006244 | ENSBTAG00<br>000016309 | ENSECAG00<br>000017556 | ENSCAFG00<br>000016369 | ENSMUSG00<br>000021114 | ENSRNOG00<br>000009080 | ENSG000001<br>00554 | ENSPTRG00<br>000006461 | ENSMUG0<br>0000021418 |
| ATP6V1E1 | -1986.871629 | -1986.871629 | -1986.919782 | -1986.919782 | -1986.919782 | ENSPVAG00<br>000012052 | ENSMLUG00<br>000014876 | ENSBTAG00<br>000014238 | ENSECAG00<br>000016487 | ENSCAFG00<br>000015600 | ENSMUSG00<br>000019210 | ENSRNOG00<br>000011905 | ENSG000001<br>31100 | ENSPTRG00<br>000014039 | ENSMUG0<br>0000021477 |
| ATP6V1E2 | -2456.895669 | -2456.915653 | -2454.047246 | -2455.591599 | -2456.915653 | ENSPVAG00<br>000013690 | /                      | ENSBTAG00<br>000013734 | ENSECAG00<br>000013717 | ENSCAFG00<br>000002630 | ENSMUSG00<br>000053375 | ENSRNOG00<br>000015566 | ENSG000001<br>71142 | ENSPTRG00<br>000011893 | ENSMUG0<br>0000005392 |
| ATP6V1F  | -1011.11028  | -1011.11028  | -1011.11028  | -1011.11028  | -1011.110335 | ENSPVAG00<br>000007063 | ENSMLUG00<br>000001392 | ENSBTAG00<br>000007572 | /                      | ENSCAFG00<br>000001620 | ENSMUSG00<br>000004285 | ENSRNOG00<br>000007392 | ENSG000001<br>28524 | ENSPTRG00<br>000019672 | /                     |
| ATP6V1G1 | -1270.55297  | -1270.55297  | -1270.55297  | -1270.55297  | -1270.552972 | ENSPVAG00<br>000008334 | ENSMLUG00<br>000008657 | ENSBTAG00<br>000000203 | ENSECAG00<br>000011155 | ENSCAFG00<br>000003347 | ENSMUSG00<br>000039105 | ENSRNOG00<br>000008163 | ENSG000001<br>36888 | ENSPTRG00<br>000021290 | ENSMUG0<br>0000013147 |
| ATP6V1G3 | -1597.594416 | -1597.752009 | -1597.793192 | -1597.793192 | -1597.793192 | ENSPVAG00<br>000001587 | ENSMLUG00<br>000012187 | ENSBTAG00<br>000019890 | ENSECAG00<br>000014193 | ENSCAFG00<br>000011322 | ENSMUSG00<br>000026394 | ENSRNOG00<br>000022480 | ENSG000001<br>51418 | ENSPTRG00<br>000001816 | ENSMUG0<br>0000011992 |
| ATP6V1H  | -4153.476131 | -4153.476136 | -4153.476133 | -4153.476132 | -4153.47613  | ENSPVAG00<br>000005241 | ENSMLUG00<br>000000993 | ENSBTAG00<br>000003450 | ENSECAG00<br>000024159 | ENSCAFG00<br>000006947 | ENSMUSG00<br>000033793 | ENSRNOG00<br>000030862 | ENSG000000<br>47249 | ENSPTRG00<br>000020249 | ENSMUG0<br>0000004064 |

|               |                     |                     |                    |                   |              |                        |                        |                        |                        |                        |                        |                        |                     |                        |                       |
|---------------|---------------------|---------------------|--------------------|-------------------|--------------|------------------------|------------------------|------------------------|------------------------|------------------------|------------------------|------------------------|---------------------|------------------------|-----------------------|
| COX10         | -5403.125916        | -5403.125917        | -5402.16129        | -5402.277061      | -5403.125916 | ENSPVAG00<br>000015472 | ENSMLUG00<br>000008715 | ENSBTAG00<br>000015294 | ENSECAG00<br>000025173 | ENSCAFG00<br>000017899 | ENSMUSG00<br>000042148 | ENSRNOG00<br>000024972 | ENSG000000<br>06695 | ENSPTRG00<br>000008790 | ENSMUG0<br>0000016157 |
| COX11         | -3191.088507        | -3191.541489        | -3193.146579       | -3193.206273      | -3193.206446 | ENSPVAG00<br>000012981 | ENSMLUG00<br>000007347 | ENSBTAG00<br>000007015 | ENSECAG00<br>000015531 | ENSCAFG00<br>000017347 | ENSMUSG00<br>000020544 | ENSRNOG00<br>000002458 | ENSG000001<br>66260 | ENSPTRG00<br>000009422 | ENSMUG0<br>0000010548 |
| COX15         | -4499.593077        | -4499.593077        | -4498.846202       | -4499.526092      | -4499.593076 | ENSPVAG00<br>000017893 | ENSMLUG00<br>000012997 | /                      | ENSECAG00<br>000014039 | ENSCAFG00<br>000009515 | ENSMUSG00<br>000040018 | ENSRNOG00<br>000017230 | ENSG000000<br>14919 | ENSPTRG00<br>000002835 | ENSMUG0<br>0000023762 |
| COX17         | -570.52896          | -570.52896          | -570.52896         | -570.52896        | -570.52896   | ENSPVAG00<br>000000882 | ENSMLUG00<br>000008085 | ENSBTAG00<br>000002182 | /                      | ENSCAFG00<br>000011029 | ENSMUSG00<br>000046516 | ENSRNOG00<br>000038951 | ENSG000001<br>38495 | ENSPTRG00<br>000015260 | ENSMUG0<br>0000000906 |
| <b>COX4I1</b> | <b>-1859.961685</b> | <b>-1863.426913</b> | -1862.072658       | -1863.917798      | -1863.990097 | ENSPVAG00<br>000003757 | ENSMLUG00<br>000012579 | ENSBTAG00<br>000016079 | ENSECAG00<br>000011722 | ENSCAFG00<br>000019921 | ENSMUSG00<br>000031818 | ENSRNOG00<br>000017817 | ENSG000001<br>31143 | ENSPTRG00<br>000008434 | ENSMUG0<br>0000006763 |
| COX4I2        | -1955.080468        | -1955.080468        | -1949.178739       | -1950.866842      | -1955.080468 | ENSPVAG00<br>000006111 | ENSMLUG00<br>000004800 | ENSBTAG00<br>000016171 | ENSECAG00<br>000014445 | ENSCAFG00<br>000007049 | ENSMUSG00<br>000009876 | ENSRNOG00<br>000007827 | ENSG000001<br>31055 | ENSPTRG00<br>000013358 | ENSMUG0<br>0000007383 |
| COX5A         | -1382.983496        | -1382.983496        | -1382.983496       | -1382.983496      | -1382.983496 | ENSPVAG00<br>000012957 | ENSMLUG00<br>000013702 | ENSBTAG00<br>000017267 | ENSECAG00<br>000000160 | ENSCAFG00<br>000008403 | ENSMUSG00<br>000000088 | ENSRNOG00<br>000018816 | ENSG000001<br>78741 | ENSPTRG00<br>000007289 | ENSMUG0<br>0000011677 |
| COX5B         | -1475.053751        | -1475.053751        | -1475.053751       | -1475.053751      | -1475.053751 | ENSPVAG00<br>000007115 | ENSMLUG00<br>000014512 | ENSBTAG00<br>000009149 | ENSECAG00<br>000007968 | ENSCAFG00<br>000002387 | ENSMUSG00<br>000061518 | ENSRNOG00<br>000016660 | ENSG000001<br>35940 | ENSPTRG00<br>000012257 | ENSMUG0<br>0000009730 |
| COX6A1        | -1338.675159        | -1338.67516         | -1338.675159       | -1338.675159      | -1338.675159 | ENSPVAG00<br>000002226 | ENSMLUG00<br>000010330 | ENSBTAG00<br>000008020 | ENSECAT000<br>00013033 | ENSCAFG00<br>000010302 | ENSMUSG00<br>000041697 | ENSRNOG00<br>000001170 | ENSG000001<br>11775 | ENSPTRG00<br>000005532 | ENSMUG0<br>0000002837 |
| <b>COX6A2</b> | <b>-1128.580506</b> | <b>-1131.320798</b> | -1132.207943       | -1132.231967      | -1132.984201 | ENSPVAG00<br>000010824 | /                      | ENSBTAG00<br>000019521 | ENSECAG00<br>000011578 | ENSCAFG00<br>000016887 | ENSMUSG00<br>000030785 | ENSRNOG00<br>000019851 | ENSG000001<br>56885 | ENSPTRG00<br>000008046 | ENSMUG0<br>0000014353 |
| COX6B1        | -801.406486         | -801.406486         | <b>-798.010613</b> | <b>-801.42667</b> | -801.453154  | ENSPVAG00<br>000012821 | ENSMLUG00<br>000011365 | ENSBTAG00<br>000023487 | ENSECAG00<br>000012317 | ENSCAFG00<br>000006913 | ENSMUSG00<br>000036751 | ENSRNOG00<br>000024309 | ENSG000001<br>26267 | ENSPTRG00<br>000010854 | ENSMUG0<br>0000016765 |
| COX6C         | -845.990355         | -845.990355         | -845.990355        | -845.990355       | -845.990355  | ENSPVAG00<br>000004366 | ENSMLUG00<br>000014896 | ENSBTAG00<br>000014130 | /                      | ENSCAFG00<br>000006734 | ENSMUSG00<br>000014313 | ENSRNOG00<br>000010807 | ENSG000001<br>64919 | ENSPTRG00<br>000020467 | ENSMUG0<br>0000031920 |
| COX7A1        | -1094.272943        | -1094.272943        | -1094.309298       | -1094.309298      | -1094.309298 | ENSPVAG00<br>000012887 | ENSMLUG00<br>000012331 | ENSBTAG00<br>000014878 | ENSECAG00<br>000011458 | ENSCAFG00<br>000006578 | ENSMUSG00<br>000074218 | /                      | ENSG000001<br>61281 | ENSPTRG00<br>000010888 | ENSMUG0<br>0000000250 |

|         |              |              |                     |                     |              |                        |                        |                        |                        |                        |                        |                        |                     |                        |                        |
|---------|--------------|--------------|---------------------|---------------------|--------------|------------------------|------------------------|------------------------|------------------------|------------------------|------------------------|------------------------|---------------------|------------------------|------------------------|
| COX7A2  | -901.757579  | -901.757579  | -901.757592         | -901.757579         | -901.757579  | ENSPVAG00<br>000010401 | /                      | ENSBTAG00<br>000005096 | ENSECAG00<br>000012469 | ENSCAFG00<br>000017234 | ENSMUSG00<br>000032330 | ENSRNOG00<br>000027791 | ENSG000001<br>12695 | ENSPTRG00<br>000018353 | /                      |
| COX7B   | -981.128272  | -981.128272  | -981.128272         | -981.128272         | -981.128272  | ENSPVAG00<br>000003237 | /                      | ENSBTAG00<br>000037415 | /                      | ENSCAFG00<br>000005757 | ENSMUSG00<br>000031231 | ENSRNOG00<br>000028451 | ENSG000001<br>31174 | ENSPTRG00<br>000022049 | ENSMUG00<br>0000015861 |
| COX7B2  | -1108.930237 | -1108.930237 | -1109.236237        | -1109.236237        | -1109.236237 | ENSPVAG00<br>000012089 | /                      | ENSBTAG00<br>000000003 | ENSECAG00<br>000001288 | ENSCAFG00<br>000001887 | ENSMUSG00<br>000049387 | ENSRNOG00<br>000038925 | ENSG000001<br>70516 | ENSPTRG00<br>000016027 | /                      |
| COX7C   | -588.734586  | -588.734586  | -588.734586         | -588.734586         | -588.734586  | ENSPVAG00<br>000017689 | /                      | ENSBTAG00<br>000039555 | /                      | ENSCAFG00<br>000024056 | ENSMUSG00<br>000017778 | ENSRNOG00<br>000030237 | ENSG000001<br>27184 | ENSPTRG00<br>000017060 | ENSMUG00<br>0000030098 |
| COX8A   | -843.510285  | -843.510285  | -843.437717         | -843.509582         | -843.510285  | ENSPVAG00<br>000017098 | ENSMLUG00<br>000012232 | ENSBTAG00<br>000032505 | /                      | ENSCAFG00<br>000014738 | ENSMUSG00<br>000035885 | ENSRNOG00<br>000014656 | ENSG000001<br>76340 | ENSPTRG00<br>000003816 | ENSMUG00<br>0000031143 |
| CYC1    | -3273.343123 | -3273.343123 | -3272.025644        | -3273.262292        | -3273.343123 | ENSPVAG00<br>000007102 | ENSMLUG00<br>000000669 | ENSBTAG00<br>000012232 | ENSECAG00<br>000020538 | ENSCAFG00<br>000001529 | ENSMUSG00<br>000022551 | ENSRNOG00<br>000012457 | ENSG000001<br>79091 | ENSPTRG00<br>000020679 | ENSMUG00<br>0000007149 |
| LHPP    | -3170.117609 | -3170.117609 | -3170.117609        | -3170.117609        | -3170.117609 | ENSPVAG00<br>000004591 | /                      | ENSBTAG00<br>000010957 | ENSECAG00<br>000009972 | ENSCAFG00<br>000012748 | ENSMUSG00<br>000030946 | ENSRNOG00<br>000017097 | ENSG000001<br>07902 | ENSPTRG00<br>000003030 | ENSMUG00<br>0000015215 |
| NDUFA1  | -792.224333  | -792.224333  | -792.18831          | -792.18831          | -792.18831   | ENSPVAG00<br>000006776 | ENSMLUG00<br>000006685 | ENSBTAG00<br>000006033 | ENSECAG00<br>000020907 | /                      | ENSMUSG00<br>000016427 | ENSRNOG00<br>000040005 | ENSG000001<br>25356 | ENSPTRG00<br>000022230 | ENSMUG00<br>0000032194 |
| NDUFA10 | -4750.228007 | -4750.228007 | <b>-4746.702114</b> | <b>-4750.112146</b> | -4750.228007 | ENSPVAG00<br>000004806 | ENSMLUG00<br>000005086 | ENSBTAG00<br>000003279 | ENSECAG00<br>000021275 | ENSCAFG00<br>000012591 | ENSMUSG00<br>000026260 | ENSRNOG00<br>000016470 | ENSG000001<br>30414 | ENSPTRG00<br>000013099 | ENSMUG00<br>0000010382 |
| NDUFA12 | -1357.572372 | -1357.572372 | -1356.217754        | -1357.572372        | -1357.572372 | ENSPVAG00<br>000007564 | /                      | ENSBTAG00<br>000014669 | ENSECAG00<br>000015836 | ENSCAFG00<br>000006232 | ENSMUSG00<br>000020022 | ENSRNOG00<br>000007407 | ENSG000001<br>84752 | ENSPTRG00<br>000005306 | ENSMUG00<br>0000018897 |
| NDUFA13 | -2656.494084 | -2656.494084 | -2656.491065        | -2656.491065        | -2656.491065 | ENSPVAG00<br>000017454 | ENSMLUG00<br>000017367 | ENSBTAG00<br>000007812 | ENSECAG00<br>000017928 | ENSCAFG00<br>000014244 | ENSMUSG00<br>000036199 | ENSRNOG00<br>000020602 | ENSG000001<br>30288 | ENSPTRG00<br>000010741 | ENSMUG00<br>0000011350 |
| NDUFA2  | -1414.906906 | -1414.906906 | -1414.906906        | -1414.906906        | -1414.906906 | ENSPVAG00<br>000009708 | ENSMLUG00<br>000003190 | ENSBTAG00<br>000015041 | ENSECAG00<br>000023131 | ENSCAFG00<br>000005861 | ENSMUSG00<br>000014294 | ENSRNOG00<br>000017571 | ENSG000001<br>31495 | ENSPTRG00<br>000017321 | ENSMUG00<br>0000010011 |
| NDUFA3  | -1120.063638 | -1120.323008 | -1121.930849        | -1121.930849        | -1121.930849 | ENSPVAG00<br>000015560 | ENSMLUG00<br>000016856 | ENSBTAG00<br>000007754 | ENSECAG00<br>000015897 | ENSCAFG00<br>000002703 | ENSMICG00<br>000002349 | ENSRNOG00<br>000014224 | ENSG000001<br>70906 | ENSPTRG00<br>000028890 | ENSPVAG00<br>000015560 |

|          |              |              |              |              |              |                        |                        |                        |                        |                        |                        |                        |                     |                        |                        |
|----------|--------------|--------------|--------------|--------------|--------------|------------------------|------------------------|------------------------|------------------------|------------------------|------------------------|------------------------|---------------------|------------------------|------------------------|
| NDUFA4   | -802.331161  | -802.331161  | -802.331161  | -802.331161  | -802.331161  | ENSPVAG00<br>000006660 | ENSMLUG00<br>000006470 | ENSBTAG00<br>000011145 | /                      | /                      | ENSMUSG00<br>000029632 | ENSRNOG00<br>000005512 | ENSG000001<br>89043 | ENSPTRG00<br>000018934 | /                      |
| NDUFA4L2 | -766.410424  | -766.410424  | -766.410424  | -766.410424  | -766.410424  | ENSPVAG00<br>000003964 | ENSMLUG00<br>000004963 | ENSBTAG00<br>000031503 | ENSECAG00<br>000023525 | ENSCAFG00<br>000000200 | ENSMUSG00<br>000040280 | ENSRNOG00<br>000031851 | ENSG000001<br>85633 | ENSPTRG00<br>000005125 | ENSMMUG0<br>0000021786 |
| NDUFA6   | -660.516162  | -660.518652  | -660.528127  | -660.528127  | -660.528127  | ENSPVAG00<br>000001196 | ENSMLUG00<br>000000556 | ENSBTAG00<br>000009509 | ENSECAG00<br>000022520 | ENSCAFG00<br>000000982 | ENSMUSG00<br>000022450 | ENSRNOG00<br>000008569 | ENSG000001<br>84983 | ENSPTRG00<br>000014449 | ENSMMUG0<br>0000013060 |
| NDUFA7   | -1323.484101 | -1323.484101 | -1323.873734 | -1323.873734 | -1323.873734 | ENSPVAG00<br>000009642 | ENSMLUG00<br>000003194 | ENSBTAG00<br>000002466 | ENSECAG00<br>000014853 | ENSCAFG00<br>000018497 | ENSMUSG00<br>000041881 | ENSRNOG00<br>000006939 | ENSG000001<br>67774 | ENSPTRG00<br>000010418 | ENSMMUG0<br>0000016697 |
| NDUFA8   | -2044.277676 | -2044.277676 | -2044.277676 | -2044.277676 | -2044.277676 | ENSPVAG00<br>000000860 | ENSMLUG00<br>000004776 | ENSBTAG00<br>000004295 | ENSECAG00<br>000023040 | ENSCAFG00<br>000020282 | ENSMUSG00<br>000026895 | ENSRNOG00<br>000005668 | ENSG000001<br>19421 | ENSPTRG00<br>000021319 | ENSMMUG0<br>0000011450 |
| NDUFA9   | -4329.489398 | -4329.489398 | -4331.561088 | -4331.773627 | -4331.818045 | ENSPVAG00<br>000012888 | /                      | ENSBTAG00<br>000005465 | ENSECAG00<br>000016601 | ENSCAFG00<br>000015320 | ENSMUSG00<br>000000399 | ENSRNOG00<br>000026930 | ENSG000001<br>39180 | ENSPTRG00<br>000004557 | ENSMMUG0<br>0000020813 |
| NDUFAB1  | -1808.006798 | -1808.006798 | -1808.006798 | -1808.006798 | -1808.006798 | ENSPVAG00<br>000008438 | ENSMLUG00<br>000012145 | ENSBTAG00<br>000006391 | ENSECAG00<br>000010779 | ENSCAFG00<br>000017667 | ENSMUSG00<br>000030869 | ENSRNOG00<br>000018129 | ENSG000000<br>04779 | ENSPTRG00<br>000007889 | ENSMMUG0<br>0000020522 |
| NDUFB1   | -507.613383  | -507.613383  | /            | /            | -507.613383  | ENSPVAG00<br>000015319 | ENSMLUG00<br>000011664 | ENSBTAG00<br>000015156 | ENSECAG00<br>000023911 | ENSCAFG00<br>000010903 | /                      | /                      | ENSG000001<br>83648 | ENSPTRG00<br>000006649 | ENSMMUG0<br>0000022428 |
| NDUFB10  | -1958.673874 | -1958.673874 | -1958.673873 | -1958.673873 | -1958.673873 | ENSPVAG00<br>000016701 | ENSMLUG00<br>000011655 | ENSBTAG00<br>000009534 | ENSECAG00<br>000020610 | ENSCAFG00<br>000019476 | ENSMUSG00<br>000040048 | ENSRNOG00<br>000014568 | ENSG000001<br>40990 | ENSPTRG00<br>000007618 | ENSMMUG0<br>0000029268 |
| NDUFB11  | -1827.054442 | -1827.054442 | -1825.102352 | -1826.649461 | -1827.054442 | ENSPVAG00<br>000006786 | ENSMLUG00<br>000013092 | /                      | ENSECAG00<br>000020805 | ENSCAFG00<br>000014834 | /                      | ENSRNOG00<br>000005572 | ENSG000001<br>47123 | ENSPTRG00<br>000021836 | ENSMMUG0<br>0000017422 |
| NDUFB2   | -1365.022784 | -1365.022784 | -1365.022784 | -1365.022784 | -1365.022784 | ENSPVAG00<br>000015736 | ENSMLUG00<br>000014604 | ENSBTAG00<br>000021759 | ENSECAG00<br>000000877 | ENSCAFG00<br>000003930 | ENSMUSG00<br>000002416 | ENSRNOG00<br>000026616 | ENSG000000<br>90266 | ENSPTRG00<br>000019771 | ENSMMUG0<br>0000015284 |
| NDUFB3   | -1068.299538 | -1068.299538 | -1066.76948  | -1068.138358 | -1068.299538 | ENSPVAG00<br>000003269 | ENSMLUG00<br>000012878 | ENSBTAG00<br>000012760 | ENSECAG00<br>000020674 | ENSCAFG00<br>000012111 | /                      | ENSRNOG00<br>000011825 | ENSG000001<br>19013 | ENSPTRG00<br>000012797 | ENSMMUG0<br>0000012225 |
| NDUFB4   | -1595.815561 | -1595.815562 | -1595.22617  | -1595.813449 | -1595.815561 | ENSPVAG00<br>000014844 | /                      | ENSBTAG00<br>000015892 | ENSECAG00<br>000015610 | ENSCAFG00<br>000011204 | ENSMUSG00<br>000022820 | ENSRNOG00<br>000002721 | ENSG000000<br>65518 | ENSPTRG00<br>000015270 | ENSMMUG0<br>0000001592 |



|        |              |              |              |              |              |                        |                        |                        |                        |                        |                        |                        |                     |                        |                       |
|--------|--------------|--------------|--------------|--------------|--------------|------------------------|------------------------|------------------------|------------------------|------------------------|------------------------|------------------------|---------------------|------------------------|-----------------------|
| NDUFB5 | -2292.289273 | -2292.289273 | -2291.789946 | -2291.789946 | -2292.289273 | ENSPVAG00<br>000004286 | ENSMLUG00<br>000000999 | ENSBTAG00<br>000002463 | ENSECAG00<br>000000682 | /                      | ENSMUSG00<br>000027673 | ENSRNOG00<br>000011949 | ENSG000001<br>36521 | ENSPTRG00<br>000015649 | ENSMUG0<br>000007554  |
| NDUFB7 | -1695.410032 | -1695.410032 | -1694.823133 | -1695.410032 | -1695.410032 | ENSPVAG00<br>000006960 | ENSMLUG00<br>000008446 | ENSBTAG00<br>000012634 | ENSECAG00<br>000017656 | ENSCAFG00<br>000016258 | ENSMUSG00<br>000033938 | ENSRNOG00<br>000028717 | ENSG000000<br>99795 | ENSPTRG00<br>000010596 | ENSMUG0<br>0000021612 |
| NDUFB8 | -1972.221556 | -1972.221556 | -1972.029554 | -1972.029554 | -1972.221556 | ENSPVAG00<br>000008011 | ENSMLUG00<br>000015094 | ENSBTAG00<br>000000091 | ENSECAG00<br>000010039 | ENSCAFG00<br>000009698 | ENSMUSG00<br>000025204 | ENSRNOG00<br>000014078 | ENSG000001<br>66136 | ENSPTRG00<br>000002851 | ENSMUG0<br>0000006636 |
| NDUFB9 | -1835.457499 | -1835.457499 | -1834.204175 | -1834.781037 | -1835.457499 | ENSPVAG00<br>000009153 | ENSMLUG00<br>000003765 | ENSBTAG00<br>000020405 | ENSECAG00<br>000018238 | ENSCAFG00<br>000001045 | ENSMUSG00<br>000022354 | ENSRNOG00<br>000009364 | ENSG000001<br>47684 | ENSPTRG00<br>000020569 | ENSMUG0<br>0000015493 |
| NDUFC1 | -1094.687808 | -1094.687808 | -1094.687831 | -1094.687808 | -1094.687808 | ENSPVAG00<br>000009582 | ENSMLUG00<br>000009082 | ENSBTAG00<br>000039582 | ENSECAG00<br>000021948 | ENSCAFG00<br>000003724 | ENSMUSG00<br>000037152 | ENSRNOG00<br>000038218 | ENSG000001<br>09390 | ENSPTRG00<br>000016452 | ENSMUG0<br>0000018182 |
| NDUFC2 | -1457.428438 | -1457.428438 | -1456.519535 | -1457.403997 | -1457.428438 | ENSPVAG00<br>000013258 | ENSMLUG00<br>000014617 | ENSBTAG00<br>000018188 | /                      | ENSCAFG00<br>000004842 | ENSMUSG00<br>000030647 | ENSRNOG00<br>000012383 | ENSG000001<br>51366 | ENSPTRG00<br>000004111 | ENSMUG0<br>0000017471 |
| NDUFS1 | -6427.262524 | -6427.262524 | -6427.262524 | -6427.262524 | -6427.262524 | ENSPVAG00<br>000017332 | ENSMLUG00<br>000016594 | ENSBTAG00<br>000021976 | ENSECAG00<br>000015914 | ENSCAFG00<br>000013333 | ENSMUSG00<br>000025968 | ENSRNOG00<br>000011849 | ENSG000000<br>23228 | ENSPTRG00<br>000012842 | ENSMUG0<br>0000016788 |
| NDUFS2 | -4262.270525 | -4262.270525 | -4256.74737  | -4258.266874 | -4262.270525 | ENSPVAG00<br>000005536 | ENSMLUG00<br>000004570 | ENSBTAG00<br>000002203 | ENSECAG00<br>000009102 | ENSCAFG00<br>000012850 | ENSMUSG00<br>000013593 | ENSRNOG00<br>000038372 | ENSG000001<br>58864 | ENSPTRG00<br>000001577 | ENSMUG0<br>0000004520 |
| NDUFS3 | -2730.297756 | -2730.297757 | -2723.991651 | -2724.542081 | -2730.297756 | ENSPVAG00<br>000007344 | ENSMLUG00<br>000016649 | ENSBTAG00<br>000018483 | ENSECAG00<br>000013454 | ENSCAFG00<br>000008411 | ENSMUSG00<br>000005510 | ENSRNOG00<br>000009155 | ENSG000002<br>13619 | ENSPTRG00<br>000003571 | ENSMUG0<br>0000004286 |
| NDUFS4 | -1733.131391 | -1733.131391 | -1732.059621 | -1732.750983 | -1733.131391 | ENSPVAG00<br>000013996 | ENSMLUG00<br>000005715 | ENSBTAG00<br>000003728 | ENSECAG00<br>000017188 | ENSCAFG00<br>000018399 | ENSMUSG00<br>000021764 | ENSRNOG00<br>000011383 | ENSG000001<br>64258 | ENSPTRG00<br>000016864 | ENSMUG0<br>0000004861 |
| NDUFS5 | -1433.811032 | -1433.811032 | -1432.852399 | -1433.725421 | -1433.811032 | ENSPVAG00<br>000001993 | ENSMLUG00<br>000007383 | ENSBTAG00<br>000010232 | ENSECAG00<br>000011681 | ENSCAFG00<br>000003185 | ENSMUSG00<br>000028648 | ENSRNOG00<br>000030585 | ENSG000001<br>68653 | ENSPTRG00<br>000000568 | ENSMUG0<br>0000007657 |
| NDUFS6 | -1795.000969 | -1795.000969 | -1795.018444 | -1795.018444 | -1795.018444 | ENSPVAG00<br>000003578 | ENSMLUG00<br>000016888 | ENSBTAG00<br>000009914 | ENSECAG00<br>000021690 | ENSCAFG00<br>000010444 | ENSMUSG00<br>000021606 | ENSRNOG00<br>000018068 | ENSG000001<br>45494 | ENSPTRG00<br>000016706 | ENSMUG0<br>0000004447 |
| NDUFS8 | -2183.897564 | -2183.897564 | -2183.088688 | -2183.088688 | -2183.897564 | ENSPVAG00<br>000001185 | ENSMLUG00<br>000017611 | ENSBTAG00<br>000012072 | ENSECAG00<br>000010175 | ENSCAFG00<br>000011083 | ENSMUSG00<br>000059734 | ENSRNOG00<br>000017446 | ENSG000001<br>10717 | ENSPTRG00<br>000003978 | ENSMUG0<br>0000023189 |

|          |              |              |              |              |              |                        |                        |                        |                        |                        |                        |                        |                     |                        |                       |
|----------|--------------|--------------|--------------|--------------|--------------|------------------------|------------------------|------------------------|------------------------|------------------------|------------------------|------------------------|---------------------|------------------------|-----------------------|
| NDUFV1   | -4766.297301 | -4766.297301 | -4766.297301 | -4766.297301 | -4766.297301 | ENSPVAG00<br>000008590 | ENSMLUG00<br>000011539 | ENSBTAG00<br>000021776 | ENSECAG00<br>000021477 | ENSCAFG00<br>000011109 | ENSMUSG00<br>000037916 | ENSRNOG00<br>000018117 | ENSG000001<br>67792 | ENSPTRG00<br>000003969 | ENSMUG0<br>0000018526 |
| NDUFV2   | -2183.409745 | -2183.409721 | -2180.110411 | -2181.901269 | -2183.409721 | ENSPVAG00<br>000004820 | ENSMLUG00<br>000013503 | ENSBTAG00<br>000004871 | ENSECAG00<br>000009904 | ENSCAFG00<br>000018686 | ENSMUSG00<br>000024099 | ENSRNOG00<br>000032758 | ENSG000001<br>78127 | ENSPTRG00<br>000009856 | ENSMUG0<br>0000001354 |
| SDHA     | -7980.601141 | -7980.60114  | -7980.60114  | -7980.60114  | -7980.60114  | ENSPVAG00<br>000009296 | ENSMLUG00<br>000017004 | /                      | ENSECAG00<br>000000397 | ENSCAFG00<br>000010951 | ENSMUSG00<br>000021577 | ENSRNOG00<br>000013331 | ENSG000000<br>73578 | ENSPTRG00<br>000016677 | ENSMUG0<br>0000011012 |
| SDHB     | -2890.982372 | -2890.982372 | -2890.959143 | -2890.959143 | -2890.959143 | ENSPVAG00<br>000009792 | ENSMLUG00<br>000000032 | ENSBTAG00<br>000008314 | ENSECAG00<br>000011758 | ENSCAFG00<br>000015832 | ENSMUSG00<br>000009863 | ENSRNOG00<br>000007967 | ENSG000001<br>17118 | ENSPTRG00<br>000000242 | ENSMUG0<br>0000009488 |
| SDHC     | -2309.121986 | -2309.121986 | -2305.692559 | -2307.549006 | -2309.121986 | ENSPVAG00<br>000005544 | ENSMLUG00<br>000007759 | ENSBTAG00<br>000015853 | ENSECAG00<br>000014215 | ENSCAFG00<br>000012992 | ENSMUSG00<br>000058076 | ENSRNOG00<br>000003163 | ENSG000001<br>43252 | ENSPTRG00<br>000001585 | ENSMUG0<br>0000000346 |
| SDHD     | -1856.815523 | -1857.341156 | -1857.35055  | -1857.35055  | -1857.35055  | ENSPVAG00<br>000009622 | ENSMLUG00<br>000012228 | ENSBTAG00<br>000016266 | /                      | ENSCAFG00<br>000024546 | ENSMUSG00<br>000000171 | ENSRNOG00<br>000022980 | ENSG000002<br>04370 | ENSPTRG00<br>000028397 | ENSMUG0<br>0000015247 |
| UQCR     | -577.974777  | -577.974777  | -577.995738  | -577.995738  | -577.995738  | /                      | ENSMLUG00<br>000006169 | ENSBTAG00<br>000008692 | ENSECAG00<br>000022524 | ENSCAFG00<br>000019501 | ENSMUSG00<br>000020163 | ENSRNOG00<br>000016952 | ENSG000001<br>27540 | ENSPTRG00<br>000010210 | ENSMUG0<br>0000009016 |
| UQCRB    | -1408.695147 | -1408.695137 | -1409.07848  | -1409.07848  | -1409.07848  | ENSPVAG00<br>000012321 | ENSMLUG00<br>000007182 | ENSBTAG00<br>000006660 | ENSECAG00<br>000009780 | ENSCAFG00<br>000009449 | ENSMUSG00<br>000021520 | ENSRNOG00<br>000024967 | ENSG000001<br>56467 | ENSPTRG00<br>000020440 | ENSMUG0<br>0000008804 |
| UQCRC1   | -5109.771344 | -5109.771344 | -5107.775675 | -5109.428404 | -5109.771344 | ENSPVAG00<br>000006648 | ENSMLUG00<br>000000505 | ENSBTAG00<br>000019096 | ENSECAG00<br>000020020 | ENSCAFG00<br>000012329 | ENSMUSG00<br>000025651 | ENSRNOG00<br>000032134 | ENSG000000<br>10256 | ENSPTRG00<br>000014892 | ENSMUG0<br>0000014705 |
| UQCRC2   | -4774.873893 | -4774.873893 | -4773.831643 | -4774.001865 | -4774.873893 | ENSPVAG00<br>000007993 | ENSMLUG00<br>000003345 | ENSBTAG00<br>000021651 | ENSECAG00<br>000021501 | ENSCAFG00<br>000017756 | /                      | ENSRNOG00<br>000036742 | ENSG000001<br>40740 | ENSPTRG00<br>000007871 | ENSMUG0<br>0000018287 |
| UQCRCFS1 | -3826.316352 | -3826.316352 | -3826.316352 | -3826.316352 | -3826.316352 | /                      | ENSMLUG00<br>000001479 | /                      | ENSECAG00<br>000004824 | ENSCAFG00<br>000007636 | ENSMUSG00<br>000038462 | ENSRNOG00<br>000018281 | ENSG000001<br>69021 | ENSPTRG00<br>000010777 | ENSMUG0<br>0000008417 |
| UQCRH    | -860.01673   | -860.01673   | -860.01673   | -860.01673   | -898.165555  | ENSPVAG00<br>000010154 | ENSMLUG00<br>000003779 | ENSBTAG00<br>000009603 | ENSECAG00<br>000019073 | ENSCAFG00<br>000004260 | ENSMUSG00<br>000063882 | ENSRNOG00<br>000012550 | ENSG000001<br>73660 | ENSPTRG00<br>000000691 | ENSMUG0<br>0000004204 |
| UQCRCQ   | -898.165555  | -898.165555  | -898.177795  | -898.177795  | -898.177795  | ENSPVAG00<br>000015201 | ENSMLUG00<br>000007686 | ENSBTAG00<br>000009479 | /                      | ENSCAFG00<br>000000919 | ENSMUSG00<br>000044894 | ENSRNOG00<br>000007233 | ENSG000001<br>64405 | ENSPTRG00<br>000017226 | ENSMUG0<br>0000015635 |

Table S4: List of 77 nuclear-encoded OXPHOS genes re-sequenced in this study

| Gene Name       | Primers                                                                                                               | GenBank Accession Numbers |                                |                          |                                |
|-----------------|-----------------------------------------------------------------------------------------------------------------------|---------------------------|--------------------------------|--------------------------|--------------------------------|
|                 |                                                                                                                       | <i>Scotophilus kuhlii</i> | <i>Miniopterus fuliginosus</i> | <i>Cynopterus sphinx</i> | <i>Rousettus leschenaultia</i> |
| <i>ATP4A</i>    | F5'-3' ATTGCTGCCCGTCTCCGTGTG<br>R5'-3' TATAAATGAGGTATGGCGTCA                                                          | GU292797                  |                                | GU292798                 |                                |
| <i>ATP5A1</i>   | F5'-3' TGCAGATGCCATGAAG<br>R5'-3' GTTAGACGCACGCCAC<br>F5'-3' GATAGCTTGGTGCCCATTTGGTC<br>R5'-3' ACCCTCTTACACCGGCATA    | GQ427677                  | GQ427678                       | GQ427679                 | GQ427680                       |
| <i>ATP5B</i>    | F5'-3' TCTGTGTTTGTGGTGTG<br>R5'-3' ATCGGCAGGCACATAGATA                                                                |                           | GU292799                       | GU292800                 | GU292801                       |
| <i>ATP5C1</i>   | F5'-3' GTTYTCTCGGGCGGGCGT<br>R5'-3' CGGGTGCGATTGAARGTC<br>F5'-3' CYACTTTTGGAGAYGC<br>R5'-3' AACTCCTTTGTGATGA          | GQ427681                  | GQ427682                       | GQ427683                 | GQ427684                       |
| <i>ATP5D</i>    | F5'-3' TGTCTTYACCTTCGC<br>R5'-3' GGATTTGGATCTCRGCC                                                                    |                           | GQ427685                       | GQ427686                 | GQ427687                       |
| <i>ATP5G2</i>   | F5'-3' CGCCAAGTTYGTCTCCAC<br>R5'-3' AGAAAGGCCACCATCAGG<br>F5'-3' GCAGTGGTGCTRAAACGACC<br>R5'-3' TGGCGAAGAGGATGAGAAAGG | GQ427688                  | GQ427689                       | GQ427690                 | GQ427691                       |
| <i>ATP5G3</i>   | F5'-3' CTGCACCCCMGCTCTGAT<br>R5'-3' CAAGAAAGCAACCATCAA<br>F5'-3' GCCTGCACCYCAGCTCTGA<br>R5'-3' TCAAGAAAGCAACCATCAA    | GQ427692                  | GQ427693                       | GQ427694                 | GQ427695                       |
| <i>ATP5H</i>    | F5'-3' CCATTGACTGGGTAGCTT<br>R5'-3' TGGTTTCYGGGAAGACTT                                                                | GQ427696                  | GQ427697                       | GQ427698                 | GQ427699                       |
| <i>ATP5I</i>    | F5'-3' TKCCGCCGGTGCAGGTCT<br>R5'-3' TCCCKCTCGATCCGCTTC                                                                |                           |                                |                          | GQ427700                       |
| <i>ATP5O</i>    | F5'-3' GCAGGTGCGATGCTTCAG<br>R5'-3' KGCCCTGCTCAGCTTCTG                                                                | GQ427701                  | GQ427702                       | GQ427703                 | GQ427704                       |
| <i>ATP6V0B</i>  | F5'-3' GTCTTCGTGGCYTTCTGG<br>R5'-3' TCTTCACTCTGGAGGTCTG                                                               | GQ427705                  | GQ427706                       | GQ427707                 | GQ427708                       |
| <i>ATP6V0C</i>  | F5'-3' ATGTCCGAGGCCAAGARCG<br>R5'-3' GGATGAGSGCAACGATGA                                                               | GQ427711                  | GQ427709                       | GQ427710                 | GQ427712                       |
| <i>ATP6V0D1</i> | F5'-3' AGCCARGCSGACTACCTC<br>R5'-3' CACCAGCTCGGGATAGA<br>F5'-3' AGCCARGCSGACTACCTC<br>R5'-3' GCTTCACAAAGGCGTAAA       |                           |                                | GQ427713                 | GQ427714                       |
| <i>ATP6V0E1</i> | F5'-3' CGTGATGAGCGTGTCTG<br>R5'-3' AGGCCAGTGATRCTTGAGATAC                                                             | GQ427715                  | GQ427716                       | GQ427717                 | GQ427718                       |
| <i>ATP6V1A</i>  | F5'-3' AGGTGCAGCCATGTATGAGC                                                                                           | GQ427719                  |                                |                          | GQ427720                       |

|                 |                              |          |          |          |          |
|-----------------|------------------------------|----------|----------|----------|----------|
|                 | R5'-3' GGGCAGTGGTTTCAACAGCT  |          |          |          |          |
|                 | F5'-3' TTCTCTGCTGCTGGCTTACC  |          |          |          |          |
| <i>ATP6V1B2</i> | R5'-3' CGAGGGTAGAACTCGCTC    | GQ427721 | GQ427722 | GQ427723 | GQ427724 |
|                 | F5'-3' GCGTTCATATATTGTGGC    |          |          |          |          |
|                 | R5'-3' GCCTATCAGTGTGAGAAA    |          |          |          |          |
| <i>ATP6V1C1</i> | F5'-3' ATAACTGAAAAGGGAATC    |          |          | GQ427725 | GQ427726 |
|                 | R5'-3' ATCTTGTAGTACACATACGG  |          |          |          |          |
| <i>ATP6V1D</i>  | F5'-3' CATGAAGGCTCGATTAAA    |          |          |          |          |
|                 | R5'-3' TTCAGCCAGAAGATTRGC    | GQ427728 | GQ427729 | GQ427727 |          |
|                 | F5'-3' ATGTCGGGCAAAGACC      |          |          |          |          |
|                 | R5'-3' YTCCGTTKCTCCAATCC     |          |          |          |          |
| <i>ATP6V1E1</i> | F5'-3' ATTGAGAAAGGTCGTCYGT   |          |          |          |          |
|                 | R5'-3' ATCATCTGCTGGGCTATG    | GQ427730 | GQ427731 | GQ427732 | GQ427733 |
|                 | F5'-3' AACATTGAGAAAGTCGTC    |          |          |          |          |
|                 | R5'-3' CAACAACTGGTACAAACC    |          |          |          |          |
| <i>ATP6V1E2</i> | F5'-3' TGAGTGATGYGATGTRCA    |          |          | GQ427735 | GQ427734 |
|                 | R5'-3' GCATCTTTTGCTGGGCTA    |          |          |          |          |
| <i>ATP6V1G1</i> | F5'-3' GCTGCAGGCCGAGAAGCG    | GQ427736 | GQ427737 | GQ427738 | GQ427739 |
|                 | R5'-3' GCCGGATGTCRCAGACAAAGG |          |          |          |          |
| <i>ATP6V1G2</i> | F5'-3' AGTCARTCCAGGGTATCCA   | GQ427740 | GQ427741 | GQ427742 | GQ427743 |
|                 | R5'-3' GGCAGCAATCCGGTAGTT    |          |          |          |          |
| <i>ATP6V1H</i>  | F5'-3' GTGCGTGGATGCTGCTG     |          |          |          |          |
|                 | R5'-3' TRACCCGTTTGCCCTCGTG   |          |          |          |          |
|                 | F5'-3' GTGAACTGGCAGTCCTATCT  |          |          |          |          |
|                 | R5'-3' CAAAGCGTACTCAITGACC   | GQ427744 | GQ427745 | GQ427746 | GQ427747 |
|                 | F5'-3' GTGAACTGGCAGTCCTATCT  |          |          |          |          |
|                 | R5'-3' CTAAGACTTGTGGATCAT    |          |          |          |          |
|                 | F5'-3' CGKGGTGCYGTGGATG      |          |          |          |          |
|                 | R5'-3' ATRGAYAGAACAGGAATGA   |          |          |          |          |
| <i>ATP12A</i>   | F5'-3' TAGGAGCCATCCTGTGCT    | GQ427748 |          | GQ427749 | GQ427750 |
|                 | R5'-3' TTGGCYGAAATGATACCTAC  |          |          |          |          |
| <i>COX4I1</i>   | F5'-3' GACTATCCCTTGCCTGATGT  | GU292802 | GU292803 | GU292804 | GU292805 |
|                 | R5'-3' CACAACGTCTTCCATTCAT   |          |          |          |          |
| <i>COX4I2</i>   | F5'-3' GCGCTCTACCCCATG       |          |          | GQ427751 | GQ427752 |
|                 | R5'-3' CSGGGTTGCCCTTCAT      |          |          |          |          |
| <i>COX5A</i>    | F5'-3' CAGCCCTCGAGGCCTCC     |          |          |          |          |
|                 | R5'-3'                       | GQ427753 | GQ427754 | GQ427755 | GQ427756 |
|                 | TTCCAGTTCATTTAAAGTTGGTC      |          |          |          |          |
| <i>COX5B</i>    | F5'-3' GGCTTCAAGGTTACTYCG    | GQ427758 | GQ427760 | GQ427759 | GQ427757 |
|                 | R5'-3' CACAGCTAGGGCATCG      |          |          |          |          |
| <i>COX6A1</i>   | F5'-3' TTTCTGGGCTGCTRGG      |          |          |          |          |
|                 | R5'-3' AGRGTTATGGAATAGAGTATG | GQ427761 | GQ427762 | GQ427763 | GQ427764 |
|                 | F5'-3' CGGGTTTTYGGGCTGC      |          |          |          |          |

|               |                             |          |          |          |          |
|---------------|-----------------------------|----------|----------|----------|----------|
|               | R5'-3' ATCYTCATAGCCRGTYGGA  |          |          |          |          |
|               | F5'-3' TYTGGGCTGCTRGGTCG    |          |          |          |          |
|               | R5'-3' TTGGWCCTGATGCGGAG    |          |          |          |          |
| <i>COX6B1</i> | F5'-3' TCAAGACCAAAATCAAGA   | GQ427766 | GQ427767 | GQ427768 | GQ427769 |
|               | R5'-3' TCCCAGGAAAYGTGCC     |          |          |          |          |
| <i>COX6C</i>  | F5'-3' GATGCGYGGCCTTCTG     | GQ427770 | GQ427771 | GQ427772 | GQ427773 |
|               | R5'-3' CAGCCTTCTCATCTCC     |          |          |          |          |
|               | F5'-3' AAGCGTCTGCGATTCA     |          |          |          |          |
|               | R5'-3' GCCTTCTCATCTCCTC     |          |          |          |          |
|               | F5'-3' GCTTTGYCAAAACCTCAG   |          |          |          |          |
|               | R5'-3' TACCAGCCTTCTCATC     |          |          |          |          |
| <i>COX7A1</i> | F5'-3' CGTCCTTCAGYTCAA      | GQ427774 |          |          |          |
|               | R5'-3' CAGCCAAGGCARTACAG    |          |          |          |          |
| <i>COX7A2</i> | F5'-3' GCCCAGAGGACCATAA     | GQ427777 | GQ427775 | GQ427776 | GQ427778 |
|               | R5'-3' GAAAGGAAGCCAYAGC     |          |          |          |          |
| <i>COX7B</i>  | F5'-3' AAAACGCMCTAAGTCG     | GQ427779 | GQ427780 | GQ427781 | GQ427782 |
|               | R5'-3' CATTCCTTTGGGGTGA     |          |          |          |          |
|               | F5'-3' CGTCTCCGAGTTCAA      |          |          |          |          |
|               | R5'-3' CCTTTGGGGTGACTCT     |          |          |          |          |
| <i>COX8A</i>  | F5'-3' GCTGACGCCGTSCTG      |          | GQ427785 | GQ427783 | GQ427784 |
|               | R5'-3' GYGACAGGACCCAGCC     |          |          |          |          |
| <i>COX10</i>  | F5'-3' AAACCRAAGCCAGAACC    |          | GQ427788 | GQ427786 | GQ427787 |
|               | R5'-3' GACYGACATCATGCAGTAG  |          |          |          |          |
| <i>COX11</i>  | F5'-3' CCGAAGAGCACGAAYCC    | GQ427789 |          |          | GQ427790 |
|               | R5'-3' TCAGCAAATTCAGGATC    |          |          |          |          |
| <i>COX15</i>  | F5'-3' CCCGTGTCTCCGACTCCT   | GQ427791 | GQ427792 |          |          |
|               | R5'-3' GCCCGACTGGTGAGTAGCAG |          |          |          |          |
|               | F5'-3' GCAGCGATTACTCCTTCCGC |          |          |          |          |
|               | R5'-3' GCCCGACTGGTGAGTAGCAG |          |          |          |          |
| <i>CYC1</i>   | F5'-3' GCCGRAAAGTGATGCT     |          | GQ427793 | GQ427794 | GQ427795 |
|               | R5'-3' CTTGGCTACCTGRGACA    |          |          |          |          |
| <i>LHPP</i>   | F5'-3' GGTGCTGCTCGACATC     |          | GQ427796 | GQ427797 |          |
|               | R5'-3' GTCRCTGGGCCTGAACT    |          |          |          |          |
| <i>NDUFA1</i> | F5'-3' GGTCGAGATTCTCCC      |          | GQ427798 | GQ427799 |          |
|               | R5'-3' TCCAAACCCCTTGACA     |          |          |          |          |
| <i>NDUFA2</i> | F5'-3' ARCTGGGYCTACGRGA     | GQ427800 | GQ427801 | GQ427802 | GQ427803 |
|               | R5'-3' GCTTTGCCACTTAGC      |          |          |          |          |
|               | F5'-3' GYCTACGYGAGATTCG     |          |          |          |          |
|               | R5'-3' AGGGCTCTGKTTACCTGAT  |          |          |          |          |
| <i>NDUFA3</i> | F5'-3' GAATGCCTGGCCAAGGA    | GQ427804 | GQ427805 | GQ427806 | GQ427807 |
|               | R5'-3' GGCACGTCRGGCATGTTC   |          |          |          |          |
| <i>NDUFA4</i> | F5'-3' AGCATCCMAGCTTGAT     | GQ427808 | GQ427809 | GQ427810 | GQ427811 |
|               | R5'-3' TCTGGACCTTCTTTCTTC   |          |          |          |          |

|                |                                                                                                                      |          |          |          |          |
|----------------|----------------------------------------------------------------------------------------------------------------------|----------|----------|----------|----------|
|                | F5'-3' GCTCCGCCAGATCSTC<br>R5'-3' GACCTTCTTTCTTCAGTTTG                                                               |          |          |          |          |
| <i>NDUFA6</i>  | F5'-3' CGATTTCCTTAGCAAGATGG<br>R5'-3' TTTCATGGAAGAACCGCATA                                                           | GU292806 | GU292807 | GU292808 | GU292809 |
| <i>NDUFA7</i>  | F5'-3' GCTRCGGAAGTGGGCMTC<br>R5'-3' GGYGTCACYGCCTTCTTC                                                               |          |          |          | GQ427812 |
| <i>NDUFA8</i>  | F5'-3' CCYACTCTGGAGGATCT<br>R5'-3' RTGYTTGGCAGGCTTC<br>F5'-3' CGGGATMGTGGAGCT<br>R5'-3' YTTGGCAGGCTTCAG              | GQ427813 | GQ427814 | GQ427815 | GQ427816 |
| <i>NDUFA13</i> | F5'-3' CGAAGGTGAAGCAGGAC<br>R5'-3' CRTAGGTGGCRTTGAGAA                                                                | GQ427817 | GQ427818 | GQ427819 | GQ427820 |
| <i>NDUFB2</i>  | F5'-3' ATGTCGGYTCTGACGC<br>R5'-3' TCCAYTGGAAGGATC                                                                    | GQ427821 | GQ427822 |          |          |
| <i>NDUFB3</i>  | F5'-3' ACAATGGAAGATAGAAGGGAC<br>R5'-3' ACCACAAATGCAGCAAA<br>F5'-3' ATGGCCCATGGACATG<br>R5'-3' ATTCARCCCTACAGC        | GQ427823 | GQ427824 | GQ427825 | GQ427826 |
| <i>NDUFB4</i>  | F5'-3' ATGTCGTTCCCAAGT<br>R5'-3' TKCGATCCAATTTCC                                                                     |          |          | GQ427827 |          |
| <i>NDUFB5</i>  | F5'-3' AGCTTGCTGCAGCGGGCTTC<br>R5'-3' TCTCGAACGCATTAATCTTCG<br>F5'-3' TRCTGCAGCGGGCTTCG<br>R5'-3' TCRGGATTTGYTTTTGGA | GQ427828 | GQ427829 | GQ427830 | GQ427831 |
| <i>NDUFB7</i>  | F5'-3' TCGGGATGCCACCTT<br>R5'-3' CTGCCTCCCTCTGCTC                                                                    |          | GQ427832 | GQ427833 | GQ427834 |
| <i>NDUFB8</i>  | F5'-3' TTACCAAGGACATGCTCCCG<br>R5'-3' GAACCACTGGCTCAGGCTCT<br>F5'-3' CCGATGGCTGCAAAGGG<br>R5'-3' GGATCGCCGCTCGTT     | GQ427835 |          | GQ427836 | GQ427837 |
| <i>NDUFB9</i>  | F5'-3' GACCCAYCAGCAGAAG<br>R5'-3' CACAATATGCCACCACAG                                                                 | GQ427838 | GQ427839 | GQ427840 | GQ427841 |
| <i>NDUFB10</i> | F5'-3' RCTGGGACAAGGACGTG<br>R5'-3' GGCAGCAGYAGCYTCT                                                                  | GQ427842 | GQ427843 | GQ427844 | GQ427845 |
| <i>NDUFB11</i> | F5'-3' CSGGACTGTTAGGTTTG<br>R5'-3' CTGKCAGCTGGATCTT<br>F5'-3' CMTTTTGGCAGYAGCG<br>R5'-3' GGATCTTGCTGGGGTC            | GQ427846 | GQ427847 | GQ427848 | GQ427849 |
| <i>NDUFC2</i>  | F5'-3' CCAAGCTGACSGACC<br>R5'-3' TTCACCATAAGTTTCTTATCT                                                               | GQ427850 |          | GQ427851 | GQ427852 |
| <i>NDUFS1</i>  | F5'-3' CACAGCAGCAAGCAAC<br>R5'-3' CATTGTCTGTGAGGCT                                                                   | GQ427853 | GQ427854 | GQ427855 | GQ427856 |
| <i>NDUFS2</i>  | F5'-3' GCAGCCAGATGTGGARTG                                                                                            | GQ427857 | GQ427858 | GQ427859 |          |

|                |                                                                                                              |          |          |          |          |
|----------------|--------------------------------------------------------------------------------------------------------------|----------|----------|----------|----------|
|                | R5'-3' AGCCAGGTGGGCAAAA                                                                                      |          |          |          |          |
| <i>NDUFS3</i>  | F5'-3' CCCTCGGTGYTGTTC<br>R5'-3' GCAGGGAAAGCCTCCC                                                            |          | GQ427860 | GQ427861 | GQ427862 |
| <i>NDUFS4</i>  | F5'-3' AGGTCRTTGAGCACTT<br>R5'-3' GCCRTAAGACTTGGAC<br>F5'-3' GACACGCAACTCATAAC<br>R5'-3' CTTCAACGTCATAGCTC   | GQ427863 | GQ427864 | GQ427865 | GQ427866 |
| <i>NDUFS5</i>  | F5'-3' TRCAGAAAAGGCTGGG<br>R5'-3' AGTGGTGRGGTGGAGG<br>F5'-3' CAAAGTGCTGARCAGCC<br>R5'-3' GTGTACTTYCCCTCCTT   | GQ427867 | GQ427868 | GQ427869 | GQ427870 |
| <i>NDUFS6</i>  | F5'-3' GCGGCRGTGACCTTC<br>R5'-3' RTGSGCTGTYTGAAGTGGAG                                                        | GQ427872 | GQ427873 |          | GQ427871 |
| <i>NDUFS8</i>  | F5'-3' CACAGCAGRCAGTGG<br>R5'-3' TGTGGCRGCGATCTC                                                             |          | GQ427874 |          |          |
| <i>NDUFV1</i>  | F5'-3' AGCGGCGACRCGACAG<br>R5'-3' GGCACAGACATCTCCTCCT                                                        | GQ427875 | GQ427876 | GQ427877 | GQ427878 |
| <i>NDUFV2</i>  | F5'-3' RCATAAGACAGCTGTGCAAAAT<br>R5'-3' TGGGTGGTTCRGTCAAAGAG                                                 | GQ427879 | GQ427880 | GQ427881 | GQ427882 |
| <i>PPA1</i>    | F5'-3' CCTCGAGTACCGAGTCT<br>R5'-3' CATCCACAATGGCTTT                                                          | GQ427883 | GQ427884 | GQ427885 | GQ427886 |
| <i>PPA2</i>    | F5'-3' TACCTCGGTGGACAAA<br>R5'-3' ATAGCCCCTCCATCAC                                                           | GQ427887 | GQ427888 | GQ427889 |          |
| <i>SDHC</i>    | F5'-3' CGTGCCACCTYAGTC<br>R5'-3' GGACAGCCACYCCAGAC                                                           |          | GQ427890 |          |          |
| <i>SDHD</i>    | F5'-3' CTSTTCCTCCGAACCC<br>R5'-3' CTTTGCAGATGCCAC                                                            | GQ427893 | GQ427891 | GQ427892 | GQ427894 |
| <i>UQCRB</i>   | F5'-3' YGTTGCAGCATCARGC<br>R5'-3' TCCCGAATAACCTCTTT<br>F5'-3' GGTGGCTGGAGGGTATTC<br>R5'-3' TTCTTTGCCAATCTTCT | GQ427895 |          |          | GQ427896 |
| <i>UQCRC2</i>  | F5'-3' AGGACCTTGAGTTYACCA<br>R5'-3' TGCTGCCATTGACTTC                                                         |          |          | GQ427897 | GQ427898 |
| <i>UQCRH</i>   | F5'-3' GGGGCTRGAGGACGAG<br>R5'-3' CTGTAAARAGTTTGTGGG                                                         | GQ427899 |          | GQ427900 | GQ427901 |
| <i>UQCRQ</i>   | F5'-3' ATGGCCCGAGTTYGG<br>R5'-3' CRGCTGGATTCTTCTTSSGA                                                        | GQ427904 | GQ427902 | GQ427903 | GQ427905 |
| <i>ATP5F1</i>  | F5'-3' GAAGAACGCMGCCCTCCT<br>R5'-3' AATGCACTTGGAATTGT<br>F5'-3' ACCCTAIGTGCTYGGA<br>R5'-3' GTGCTTGRGCCTTCTT  | GQ427906 | GQ427907 | GQ427908 | GQ427909 |
| <i>ATP6V1F</i> | F5'-3' AAGCTRAITGCGGTGATC<br>R5'-3' GTCTTCGGCCGTGAACAT                                                       | GQ427912 | GQ427910 | GQ427911 | GQ427913 |

Table S5: The analyses results of the 77 resequenced nuclear-encoded OXPPOS genes

| Gene   | M1                               | N*dN | S*dS | M0                               | bat                                                 | bat1                            | branch_site bat | branch_site bat1 | M1a          | M2           | M7           | M8           | M8a          |
|--------|----------------------------------|------|------|----------------------------------|-----------------------------------------------------|---------------------------------|-----------------|------------------|--------------|--------------|--------------|--------------|--------------|
| ATP12A | $\omega=0.1188$<br>-11762.56633  | 14.2 | 41.8 | $\omega=0.1446$<br>-11963.03363  | $\omega b=0.1158, \omega_0=0.1340$<br>-11772.644739 | $\omega=0.1311$<br>-11775.51568 | -11533.22044    | -11533.22044     | -11533.22048 | -11533.22044 | -11525.54174 | -11516.13191 | -11519.06391 |
| ATP5A1 | $\omega=0.0001$<br>-1697.408702  | 0.0  | 4.8  | $\omega=0.00766$<br>-1721.211143 | $\omega b=0.0595, \omega_0=0.0065$<br>-1703.147766  | $\omega=0.0059$<br>-1705.618818 | -1695.67208     | -1695.67208      | -1695.67208  | -1695.67208  | -1698.727029 | -1695.678696 | -1695.678072 |
| ATP5B  | $\omega=0.0001$<br>-4351.401997  | 0.0  | 10.3 | $\omega=0.0423$<br>-4397.356026  | $\omega b=0.0001, \omega_0=0.0422$<br>-4361.638991  | $\omega=0.0411$<br>-4368.220205 | -4319.707052    | -4319.707052     | -4319.707052 | -4319.707052 | -4316.34142  | -4316.341396 | -4317.871063 |
| ATP5C1 | $\omega=0.3829$<br>-645.729318   | 0.0  | 0.0  | $\omega=0.0834$<br>-674.197377   | $\omega b=1.892, \omega_0=0.0781$<br>-659.521694    | $\omega=0.0781$<br>-659.521694  | -653.126367     | -653.126367      | -653.126367  | -653.125653  | -651.134971  | -650.771369  | -651.015041  |
| ATP5D  | $\omega=0.0001$<br>-1350.299709  | 0.0  | 6.4  | $\omega=0.0323$<br>-1366.459738  | $\omega b=0.0001, \omega_0=0.0325$<br>-1360.293434  | $\omega=0.0312$<br>-1362.578039 | -1356.684417    | -1356.684417     | -1356.684417 | -1356.684417 | -1353.156717 | -1353.156826 | -1353.167028 |
| ATP5F1 | $\omega=1.2614$<br>-1956.00116   | 3.0  | 1.0  | $\omega=0.2574$<br>-1982.865576  | $\omega b=0.7996, \omega_0=0.2517$<br>-1974.105532  | $\omega=0.2514$<br>-1974.117444 | -1946.3428      | -1946.376617     | -1946.733261 | -1945.397082 | -1947.699954 | -1943.714522 | -1946.188454 |
| ATP5G2 | $\omega=884.2838$<br>-819.558219 | 1.2  | 0.0  | $\omega=0.1813$<br>-845.851384   | $\omega b=999, \omega_0=0.1690$<br>-830.287634      | $\omega=0.1713$<br>-830.708473  | -818.681662     | -818.681662      | -818.681662  | -818.681662  | -818.626464  | -818.578551  | -818.603049  |
| ATP5G3 | $\omega=2.4141$<br>-821.782731   | 0.0  | 0.0  | $\omega=0.2049$<br>-852.942528   | $\omega b=0.3969, \omega_0=0.2007$<br>-826.356429   | $\omega=0.2007$<br>-826.356429  | -819.164995     | -819.164995      | -819.164995  | -819.159668  | -819.206323  | -819.159671  | -819.164986  |
| ATP5H  | $\omega=999.000$<br>-1269.78556  | 2.0  | 0.0  | $\omega=0.2113$<br>-1304.904747  | $\omega b=3.983, \omega_0=0.2023$<br>-1280.438328   | $\omega=0.2030$<br>-1280.474014 | -1266.043043    | -1266.137104     | -1266.398948 | -1265.336962 | -1269.31218  | -1266.497656 | -1266.423947 |
| ATP5I  | $\omega=0.0162$<br>-401.204269   | 1.0  | 16.6 | $\omega=0.0940$<br>-422.164384   | $\omega b=0.0072, \omega_0=0.1174$<br>-411.657491   | $\omega=0.1081$<br>-423.873319  | -407.04821      | -407.04821       | -407.04821   | -407.04821   | -405.034587  | -405.034622  | -404.983982  |
| ATP5L  | $\omega=0.7226$<br>-881.354936   | 2.1  | 1.1  | $\omega=0.2526$<br>-895.857895   | $\omega b=0.4950, \omega_0=0.2458$<br>-887.543376   | $\omega=0.2453$<br>-887.666395  | -1023.516942    | -1023.575689     | -1023.792995 | -1023.792995 | -1023.255082 | -1022.094156 | -1023.22009  |
| ATP5O  | $\omega=0.0001$<br>-2412.454467  | 0.0  | 5.6  | $\omega=0.1281$<br>-2472.539406  | $\omega b=0.0446, \omega_0=0.1275$<br>-2424.697350  | $\omega=0.1244$<br>-2425.906255 | -2410.162462    | -2410.162462     | -2410.162462 | -2410.162462 | -2399.895617 | -2399.89563  | -2399.872053 |



|          |                                 |      |      |                                 |                                                    |                                 |              |              |              |              |              |              |              |
|----------|---------------------------------|------|------|---------------------------------|----------------------------------------------------|---------------------------------|--------------|--------------|--------------|--------------|--------------|--------------|--------------|
| ATP6V1A  | $\omega=0.0395$<br>-4078.297522 | 1.0  | 10.1 | $\omega=0.0196$<br>-4136.302013 | $\omega b=0.0429, \omega_0=0.0189$<br>-4097.544849 | $\omega=0.0185$<br>-4101.560082 | -4094.574632 | -4094.574621 | -4094.95205  | -4094.95205  | -4093.369209 | -4093.369325 | -4093.355336 |
| ATP6V1C1 | $\omega=0.0001$<br>-928.930215  | 0.0  | 4.2  | $\omega=0.0332$<br>-962.544651  | $\omega b=0.0001, \omega_0=0.0334$<br>-940.406286  | $\omega=0.0338$<br>-945.556435  | -939.24046   | -939.24046   | -939.24046   | -938.821597  | -939.953972  | -938.866691  | -939.276667  |
| ATP6V1D  | $\omega=0.0001$<br>-1157.398775 | 0.0  | 2.1  | $\omega=0.0089$<br>-1172.438353 | $\omega b=0.0001, \omega_0=0.0089$<br>-1162.733576 | $\omega=0.0087$<br>-1164.350456 | -1162.777918 | -1162.777918 | -1162.77801  | -1162.777918 | -1162.801734 | -1162.801825 | -1162.80073  |
| ATP6V1E1 | $\omega=0.0001$<br>-1034.205448 | 0.0  | 3.5  | $\omega=0.0467$<br>-1058.647189 | $\omega b=0.0001, \omega_0=0.0466$<br>-1044.143256 | $\omega=0.0468$<br>-1048.104503 | -1037.91107  | -1037.91107  | -1037.91107  | -1037.91107  | -1036.325221 | -1036.325225 | -1036.32008  |
| ATP6V1E2 | $\omega=0.2612$<br>-1658.658498 | 11.5 | 17.3 | $\omega=0.2845$<br>-1707.335045 | $\omega b=0.2697, \omega_0=0.2733$<br>-1670.683737 | $\omega=0.2714$<br>-1675.278434 | -1649.451841 | -1649.451841 | -1649.59628  | -1649.59628  | -1649.58115  | -1649.438382 | -1649.439274 |
| ATP6V1F  | $\omega=0.5473$<br>-865.218484  | 0.0  | 0.0  | $\omega=0.0360$<br>-891.580865  | $\omega b=0.5389, \omega_0=0.0353$<br>-883.981830  | $\omega=0.0352$<br>-883.904274  | -883.98183   | -883.98183   | -883.90322   | -883.903165  | -882.68159   | -882.681687  | -882.65755   |
| ATP6V1G1 | $\omega=0.0001$<br>-669.958075  | 0.0  | 1.1  | $\omega=0.1223$<br>-684.208911  | $\omega b=0.4946, \omega_0=0.1194$<br>-681.064433  | $\omega=0.1194$<br>-681.064433  | -671.073151  | -671.073159  | -671.073151  | -671.073151  | -671.138345  | -670.87351   | -670.927198  |
| ATP6V1G2 | $\omega=0.0672$<br>-819.692125  | 1.0  | 4.8  | $\omega=0.0297$<br>-843.354557  | $\omega b=0.0769, \omega_0=0.0284$<br>-826.950376  | $\omega=0.0271$<br>-827.780194  | -826.867391  | -826.928528  | -827.200791  | -827.20074   | -827.01214   | -827.012223  | -827.0098    |
| ATP6V1H  | $\omega=0.3991$<br>-1995.354690 | 0.0  | 0.0  | $\omega=0.0378$<br>-2066.406662 | $\omega b=0.3994, \omega_0=0.0363$<br>-2020.946869 | $\omega=0.0363$<br>-2020.946868 | -2017.391675 | -2017.391675 | -2017.391675 | -2017.391675 | -2018.892628 | -2017.48847  | -2017.483186 |
| ATP6VOB  | $\omega=0.0001$<br>-1111.765995 | 0.0  | 7.6  | $\omega=0.0092$<br>-1133.616661 | $\omega b=0.0001, \omega_0=0.0094$<br>-1120.691593 | $\omega=0.0094$<br>-1129.238335 | -1118.617026 | -1118.617026 | -1118.617026 | -1118.617026 | -1118.87104  | -1118.622356 | -1118.622063 |
| ATP6VOC  | $\omega=999.000$<br>-1254.46761 | 1.0  | 0.0  | $\omega=0.0557$<br>-1293.900345 | $\omega b=999, \omega_0=0.0505$<br>-1278.503405    | $\omega=0.0506$<br>-1278.522749 | -1277.002786 | -1277.023977 | -1277.775066 | -1277.77507  | -1277.625774 | -1277.625787 | -1277.786408 |
| ATP6VOD1 | $\omega=0.0001$<br>-1982.700484 | 0.0  | 11.7 | $\omega=0.0629$<br>-2217.157513 | $\omega b=0.0001, \omega_0=0.0174$<br>-2018.418621 | $\omega=0.0165$<br>-2028.423855 | -2017.528513 | -2017.528504 | -2017.528504 | -2017.528505 | -2010.744888 | -2010.745069 | -2010.764624 |
| ATP6VOE1 | $\omega=0.0001$<br>-520.427937  | 0.0  | 0.0  | $\omega=0.0670$<br>-534.147098  | $\omega b=999, \omega_0=0.0601$<br>-527.644241     | $\omega=0.0604$<br>-527.760043  | -524.383726  | -524.383726  | -524.383726  | -524.383726  | -523.303637  | -523.30364   | -523.090587  |

|        |                                 |     |      |                                 |                                                    |                                 |              |              |              |              |              |              |              |
|--------|---------------------------------|-----|------|---------------------------------|----------------------------------------------------|---------------------------------|--------------|--------------|--------------|--------------|--------------|--------------|--------------|
| COX10  | $\omega=999.00$<br>-3221.05714  | 4.4 | 0.0  | $\omega=0.1365$<br>-3281.053836 | $\omega b=999, \omega 0=0.1256$<br>-3232.648006    | $\omega=0.1261$<br>-3233.140133 | -3193.870008 | -3194.049462 | -3194.948898 | -3194.948898 | -3186.879684 | -3186.879691 | -3186.825394 |
| COX11  | $\omega=0.6664$<br>-1304.258410 | 1.0 | 0.6  | $\omega=0.1131$<br>-1329.581634 | $\omega b=0.8187, \omega 0=0.1086$<br>-1324.065253 | $\omega=0.1085$<br>-1324.067684 | -1316.335625 | -1316.335625 | -1317.279618 | -1317.279618 | -1316.893938 | -1316.893942 | -1316.89077  |
| COX15  | $\omega=0.1069$<br>-3038.439740 | 2.4 | 10.3 | $\omega=0.1743$<br>-3138.630305 | $\omega b=0.0917, \omega 0=0.1721$<br>-3071.868968 | $\omega=0.1681$<br>-3076.510101 | -3058.591021 | -3058.591021 | -3058.591021 | -3058.591021 | -3054.900351 | -3054.90036  | -3054.855779 |
| Cox4I1 | $\omega=0.0870$<br>-1899.706444 | 4.4 | 3.8  | $\omega=0.1130$<br>-1930.613274 | $\omega b=0.3476, \omega 0=0.1080$<br>-1921.517156 | $\omega=0.1077$<br>-1921.821913 | -1887.458059 | -1890.1909   | -1890.922571 | -1890.922571 | -1894.453942 | -1890.632707 | -1890.633122 |
| COX4I2 | $\omega=0.0346$<br>-753.545771  | 2.1 | 15.1 | $\omega=0.1148$<br>-771.910139  | $\omega b=0.0347, \omega 0=0.1328$<br>-764.279271  | $\omega=0.1211$<br>-776.377419  | -759.917513  | -759.917513  | -759.917513  | -758.980607  | -759.024274  | -757.022583  | -758.424084  |
| COX5A  | $\omega=0.0001$<br>-1075.119847 | 0.0 | 3.2  | $\omega=0.2048$<br>-1096.360070 | $\omega b=0.0001, \omega 0=0.2081$<br>-1087.929325 | $\omega=0.2038$<br>-1089.945255 | -1067.611623 | -1067.611623 | -1067.611623 | -1067.540625 | -1067.694701 | -1067.572464 | -1067.611622 |
| COX5B  | $\omega=1.5339$<br>-1272.51926  | 5.6 | 1.4  | $\omega=0.2359$<br>-1303.592108 | $\omega b=1.276, \omega 0=0.2203$<br>-1287.564345  | $\omega=0.2205$<br>-1287.591878 | -1282.022444 | -1282.134394 | -1282.699299 | -1282.699299 | -1280.435194 | -1280.435197 | -1280.418176 |
| COX6A1 | $\omega=0.3047$<br>-740.289171  | 2.1 | 1.6  | $\omega=0.1386$<br>-756.966268  | $\omega b=0.2623, \omega 0=0.1346$<br>-746.441600  | $\omega=0.1333$<br>-746.853112  | -735.114417  | -735.114417  | -735.114417  | -735.114417  | -732.185597  | -732.185599  | -732.167699  |
| COX6B1 | $\omega=0.0001$<br>-511.424559  | 0.0 | 0.0  | $\omega=0.0833$<br>-531.363007  | $\omega b=0.0636, \omega 0=0.1029$<br>-997.226115  | $\omega=0.0940$<br>-1009.712062 | -513.795341  | -513.795341  | -513.795341  | -513.795341  | -515.43907   | -513.850811  | -513.849099  |
| COX6C  | $\omega=22.3023$<br>-614.449711 | 1.6 | 0.0  | $\omega=0.2630$<br>-636.812882  | $\omega b=0.4980, \omega 0=0.2488$<br>-626.574533  | $\omega=0.2476$<br>-626.670124  | -611.608597  | -611.671013  | -612.059664  | -610.201334  | -613.204881  | -609.340051  | -611.824122  |
| COX7A1 | $\omega=0.0641$<br>-508.121066  | 3.2 | 9.9  | $\omega=0.1255$<br>-521.220846  | $\omega b=0.0648, \omega 0=0.1334$<br>-511.995970  | $\omega=0.1326$<br>-519.682466  | -501.823262  | -501.823262  | -501.902291  | -501.516997  | -504.268122  | -500.963994  | -501.568694  |
| COX7A2 | $\omega=0.3176$<br>-614.564536  | 1.0 | 1.1  | $\omega=0.2327$<br>-647.019142  | $\omega b=0.0001, \omega 0=0.2339$<br>-628.312543  | $\omega=0.2334$<br>-629.601167  | -616.222944  | -616.222944  | -616.222944  | -615.732531  | -618.220646  | -615.713508  | -616.233916  |
| COX7B  | $\omega=0.4409$<br>-612.678089  | 0.0 | 0.0  | $\omega=0.5355$<br>-636.150767  | $\omega b=0.4302, \omega 0=0.5318$<br>-625.456411  | $\omega=0.5318$<br>-625.456411  | -618.597673  | -618.597673  | -618.597673  | -618.558206  | -618.662053  | -618.560224  | -618.598813  |

|         |                                 |     |     |                                 |                                                    |                                 |              |              |              |              |              |              |              |
|---------|---------------------------------|-----|-----|---------------------------------|----------------------------------------------------|---------------------------------|--------------|--------------|--------------|--------------|--------------|--------------|--------------|
| COX8A   | $\omega=0.2364$<br>-624.874180  | 2.0 | 2.7 | $\omega=0.2238$<br>-645.511463  | $\omega b=0.1432, \omega_0=0.2263$<br>-640.607920  | $\omega=0.2168$<br>-641.367079  | -639.11546   | -639.11546   | -639.11546   | -639.11546   | -638.572756  | -638.572759  | -638.570188  |
| CYC1    | $\omega=0.0001$<br>-2010.546910 | 0.0 | 5.5 | $\omega=0.0476$<br>-2045.070680 | $\omega b=0.0001, \omega_0=0.0484$<br>-2032.807538 | $\omega=0.0465$<br>-2035.228871 | -2032.962459 | -2032.962458 | -2032.962458 | -2032.962458 | -2028.33194  | -2028.332124 | -2028.281839 |
| LHPP    | $\omega=0.0375$<br>-2168.007207 | 1.0 | 8.6 | $\omega=0.1311$<br>-2199.686176 | $\omega b=0.0398, \omega_0=0.1312$<br>-2185.123176 | $\omega=0.1255$<br>-2186.065325 | -2167.706385 | -2167.706385 | -2167.370022 | -2167.370021 | -2157.142835 | -2157.142894 | -2157.03765  |
| NDUFA1  | $\omega=999.00$<br>-526.698458  | 3.7 | 0.0 | $\omega=0.2671$<br>-553.180716  | $\omega b=999, \omega_0=0.2407$<br>-540.655179     | $\omega=0.2404$<br>-541.548065  | -525.604581  | -525.604581  | -525.604581  | -522.357226  | -526.856299  | -522.096105  | -525.592574  |
| NDUFA13 | $\omega=0.3624$<br>-1129.863256 | 0.0 | 0.0 | $\omega=0.0622$<br>-1156.552388 | $\omega b=0.6583, \omega_0=0.0607$<br>-1142.941905 | $\omega=0.0607$<br>-1142.941905 | -1142.939934 | -1142.939934 | -1142.939963 | -1142.939934 | -1135.847111 | -1135.847179 | -1135.824467 |
| NDUFA2  | $\omega=0.0001$<br>-503.358278  | 0.0 | 0.0 | $\omega=0.0451$<br>-530.565768  | $\omega b=0.4026, \omega_0=0.0431$<br>-514.678274  | $\omega=0.0431$<br>-514.678274  | -514.678274  | -514.678274  | -514.678306  | -514.678274  | -513.286394  | -513.28643   | -513.261173  |
| NDUFA3  | $\omega=999.00$<br>-853.058757  | 2.4 | 0.0 | $\omega=0.2858$<br>-877.417881  | $\omega b=999, \omega_0=0.2814$<br>-864.716721     | $\omega=0.2816$<br>-865.169809  | -836.479837  | -836.728019  | -837.808416  | -836.853584  | -840.990151  | -837.283829  | -837.829445  |
| NDUFA4  | $\omega=0.0001$<br>-559.852189  | 0.0 | 0.8 | $\omega=0.1301$<br>-578.883359  | $\omega b=0.0001, \omega_0=0.1240$<br>-573.363854  | $\omega=0.1222$<br>-573.433981  | -564.728415  | -564.728415  | -564.70613   | -564.595668  | -565.321087  | -564.217252  | -564.709668  |
| NDUFA6  | $\omega=999$<br>-1129.35364     | 1.3 | 0.0 | $\omega=0.1569$<br>-1147.881511 | $\omega b=999, \omega_0=0.1513$<br>-1137.197351    | $\omega=0.1518$<br>-1137.367847 | -1117.610348 | -1117.733357 | -1119.332547 | -1119.332547 | -1117.551128 | -1117.262394 | -1117.369625 |
| NDUFA7  | $\omega=0.1893$<br>-868.887042  | 4.1 | 7.7 | $\omega=0.1843$<br>-889.630868  | $\omega b=0.2091, \omega_0=0.1748$<br>-880.019560  | $\omega=0.1699$<br>-882.410589  | -871.272382  | -871.272382  | -871.366216  | -871.130104  | -872.229191  | -870.668053  | -871.227252  |
| NDUFA8  | $\omega=0.0001$<br>-1690.904782 | 0.0 | 6.3 | $\omega=0.0865$<br>-1721.021687 | $\omega b=0.6184, \omega_0=0.0834$<br>-1706.601985 | $\omega=0.0834$<br>-1706.601986 | -1693.43295  | -1693.43295  | -1693.43295  | -1693.43295  | -1687.603923 | -1687.60405  | -1687.580349 |
| NDUFB10 | $\omega=0.6603$<br>-1308.511180 | 0.0 | 0.0 | $\omega=0.0962$<br>-1337.864598 | $\omega b=0.2883, \omega_0=0.0949$<br>-1325.092193 | $\omega=0.0949$<br>-1325.092193 | -1307.928151 | -1307.928151 | -1307.928151 | -1307.928151 | -1298.592542 | -1298.592565 | -1298.497371 |
| NDUFB11 | $\omega=0.4110$<br>-1739.100248 | 5.2 | 4.6 | $\omega=0.2974$<br>-1785.099760 | $\omega b=0.3689, \omega_0=0.2884$<br>-1751.559006 | $\omega=0.2877$<br>-1752.488910 | -1714.446999 | -1714.446999 | -1714.446999 | -1713.698306 | -1713.779542 | -1711.907453 | -1713.17168  |

|        |                                 |     |      |                                 |                                                    |                                 |              |              |              |              |              |              |              |
|--------|---------------------------------|-----|------|---------------------------------|----------------------------------------------------|---------------------------------|--------------|--------------|--------------|--------------|--------------|--------------|--------------|
| NDUFB2 | $\omega=0.2837$<br>-1061.709979 | 4.9 | 7.3  | $\omega=0.3390$<br>-1078.430570 | $\omega b=0.3125, \omega_0=0.3392$<br>-1071.067172 | $\omega=0.3344$<br>-1072.452142 | -1062.905537 | -1062.905537 | -1062.905537 | -1062.905537 | -1061.834124 | -1061.834161 | -1061.833788 |
| NDUFB3 | $\omega=0.3375$<br>-632.677144  | 0.0 | 0.0  | $\omega=0.2455$<br>-673.078372  | $\omega b=0.4050, \omega_0=0.2384$<br>-653.593233  | $\omega=0.2384$<br>-653.593233  | -638.246645  | -638.246645  | -638.246645  | -637.149404  | -638.522196  | -636.691675  | -638.083902  |
| NDUFB4 | $\omega=0.1294$<br>-1317.613619 | 7.6 | 22.6 | $\omega=0.3251$<br>-1337.285652 | $\omega b=0.1382, \omega_0=0.3623$<br>-1328.740488 | $\omega=0.3577$<br>-1338.890146 | -1312.941297 | -1312.941299 | -1312.941297 | -1311.643692 | -1316.129845 | -1311.651461 | -1312.989997 |
| NDUFB5 | $\omega=0.3865$<br>-1913.587668 | 0.0 | 0.0  | $\omega=0.2421$<br>-1963.585960 | $\omega b=0.3642, \omega_0=0.2381$<br>-1945.477381 | $\omega=0.2381$<br>-1945.477381 | -1905.940792 | -1905.940792 | -1905.940792 | -1905.940792 | -1905.376211 | -1903.850798 | -1904.721284 |
| NDUFB7 | $\omega=0.4870$<br>-892.499256  | 0.0 | 0.0  | $\omega=0.0441$<br>-925.143630  | $\omega b=0.0001, \omega_0=0.0440$<br>-911.796650  | $\omega=0.0438$<br>-911.812386  | -909.758921  | -909.758921  | -909.758921  | -909.758921  | -906.059699  | -906.059784  | -906.052475  |
| NDUFB8 | $\omega=0.1359$<br>-1325.483196 | 0.6 | 1.3  | $\omega=0.1233$<br>-1345.898353 | $\omega b=0.1947, \omega_0=0.1231$<br>-1339.271263 | $\omega=0.1222$<br>-1339.496969 | -1306.743272 | -1306.743272 | -1306.743272 | -1306.541943 | -1304.657075 | -1303.137001 | -1303.957633 |
| NDUFB9 | $\omega=999.00$<br>-1616.37466  | 1.0 | 0.0  | $\omega=0.1191$<br>-1642.918158 | $\omega b=999, \omega_0=0.1166$<br>-1629.666121    | $\omega=0.1168$<br>-1629.815660 | -1595.436322 | -1595.436322 | -1595.436322 | -1588.185551 | -1602.009332 | -1591.186902 | -1595.423291 |
| NDUFC2 | $\omega=0.4836$<br>-1067.400341 | 0.0 | 0.0  | $\omega=0.3618$<br>-1096.237624 | $\omega b=0.3928, \omega_0=0.3652$<br>-1087.995524 | $\omega=0.3652$<br>-1087.995524 | -1060.821404 | -1060.821404 | -1060.821404 | -1058.341447 | -1061.426243 | -1058.634859 | -1060.636522 |
| NDUFS1 | $\omega=0.3416$<br>-5975.929591 | 0.0 | 0.0  | $\omega=0.0870$<br>-6086.559140 | $\omega b=2.0599, \omega_0=0.0859$<br>-6029.535774 | $\omega=0.0859$<br>-6029.535774 | -5976.175025 | -5976.175025 | -5976.175024 | -5976.175024 | -5972.95989  | -5971.944495 | -5972.152621 |
| NDUFS2 | $\omega=0.0213$<br>-2721.611708 | 1.0 | 16.8 | $\omega=0.0362$<br>-2775.016912 | $\omega b=0.0212, \omega_0=0.0361$<br>-2741.482457 | $\omega=0.0339$<br>-2747.002188 | -2725.978064 | -2725.978064 | -2725.978064 | -2725.978064 | -2723.588543 | -2723.588607 | -2723.818723 |
| NDUFS3 | $\omega=0.2000$<br>-1993.349074 | 0.0 | 0.0  | $\omega=0.0929$<br>-2020.181592 | $\omega b=0.3994, \omega_0=0.0911$<br>-2002.934384 | $\omega=0.0911$<br>-2002.934385 | -1990.054683 | -1990.054683 | -1990.053826 | -1990.053826 | -1986.224788 | -1986.224794 | -1986.197712 |
| NDUFS4 | $\omega=999.00$<br>-726.559124  | 1.0 | 0.0  | $\omega=0.0560$<br>-781.766593  | $\omega b=999, \omega_0=0.0493$<br>-738.616385     | $\omega=0.0493$<br>-738.879556  | -738.616385  | -738.879556  | -740.009182  | -740.009182  | -740.055484  | -740.055558  | -740.062954  |
| NDUFS5 | $\omega=0.1140$<br>-852.376684  | 1.1 | 3.1  | $\omega=0.1922$<br>-883.513163  | $\omega b=0.1578, \omega_0=0.1912$<br>-861.737498  | $\omega=0.1853$<br>-862.189272  | -821.369143  | -821.369143  | -821.369143  | -814.339886  | -820.921345  | -813.886418  | -820.297493  |

|        |                                 |      |      |                                 |                                                    |                                 |              |              |              |              |              |              |              |
|--------|---------------------------------|------|------|---------------------------------|----------------------------------------------------|---------------------------------|--------------|--------------|--------------|--------------|--------------|--------------|--------------|
| DUFS6  | $\omega=0.0001$<br>-1461.404319 | 0.0  | 6.6  | $\omega=0.1644$<br>-1511.369103 | $\omega b=0.0001, \omega 0=0.1623$<br>-1481.380137 | $\omega=0.1541$<br>-1483.309811 | -1478.674141 | -1478.67414  | -1478.67414  | -1478.67414  | -1469.490999 | -1469.491086 | -1469.423515 |
| NDUFS8 | $\omega=0.0001$<br>-1459.057336 | 0.0  | 32.6 | $\omega=0.0240$<br>-1484.067291 | $\omega b=0.0001, \omega 0=0.0270$<br>-1470.883299 | $\omega=0.0206$<br>-1492.386360 | -1459.259982 | -1459.259982 | -1459.259982 | -1459.259988 | -1454.470152 | -1454.318661 | -1454.356785 |
| NDUFV1 | $\omega=0.0001$<br>-3013.399397 | 0.0  | 9.9  | $\omega=0.0743$<br>-3157.714490 | $\omega b=0.0001, \omega 0=0.0706$<br>-3077.622422 | $\omega=0.0683$<br>-3085.949245 | -3078.629497 | -3078.629497 | -3078.629576 | -3078.629497 | -3065.460871 | -3065.461137 | -3065.247306 |
| NDUFV2 | $\omega=0.0001$<br>-1616.263735 | 0.0  | 0.0  | $\omega=0.0474$<br>-1657.258686 | $\omega b=0.4024, \omega 0=0.0464$<br>-1627.899934 | $\omega=0.0464$<br>-1627.899934 | -1627.899934 | -1627.899934 | -1627.899937 | -1627.899934 | -1625.909118 | -1625.909188 | -1625.884287 |
| PPA1   | $\omega=0.0001$<br>-2369.836126 | 0.0  | 1.0  | $\omega=0.0698$<br>-2407.674691 | $\omega b=0.0001, \omega 0=0.0694$<br>-2385.107040 | $\omega=0.0692$<br>-2385.170985 | -2357.590085 | -2357.590084 | -2357.582404 | -2357.434186 | -2364.758676 | -2357.351094 | -2357.563541 |
| PPA2   | $\omega=0.0927$<br>-1779.888175 | 0.9  | 3.0  | $\omega=0.2033$<br>-1818.580412 | $\omega b=0.1300, \omega 0=0.2065$<br>-1792.969886 | $\omega=0.2040$<br>-1793.998577 | -1762.107184 | -1762.107184 | -1762.407259 | -1761.79403  | -1764.212304 | -1762.696463 | -1762.438566 |
| SDHA   | $\omega=0.0464$<br>-5967.225649 | 2.2  | 17.6 | $\omega=0.0403$<br>-6069.620750 | $\omega b=0.0457, \omega 0=0.0377$<br>-5985.904717 | $\omega=0.0369$<br>-5990.349756 | -5934.454812 | -5934.454812 | -5934.454811 | -5934.454811 | -5912.728146 | -5912.728608 | -5912.723359 |
| SDHC   | $\omega=0.0535$<br>-1383.429152 | 2.1  | 16.0 | $\omega=0.2713$<br>-1415.882026 | $\omega b=0.0542, \omega 0=0.3004$<br>-1387.761802 | $\omega=0.3003$<br>-1399.886707 | -1372.58383  | -1372.58383  | -1372.58383  | -1371.962763 | -1372.849593 | -1371.495363 | -1372.525818 |
| SDHD   | $\omega=999.00$<br>-1463.75947  | 6.6  | 0.0  | $\omega=0.2771$<br>-1488.366419 | $\omega b=999, \omega 0=0.2576$<br>-1477.440199    | $\omega=0.2592$<br>-1478.925918 | -1463.334735 | -1464.611565 | -1465.287134 | -1465.287134 | -1464.900899 | -1464.639599 | -1464.810799 |
| UQCRB  | $\omega=0.3055$<br>-914.452254  | 1.0  | 0.9  | $\omega=0.1213$<br>-945.591233  | $\omega b=0.2101, \omega 0=0.1175$<br>-930.961599  | $\omega=0.1162$<br>-931.290275  | -920.984902  | -920.984902  | -921.28948   | -921.28948   | -921.517925  | -919.065936  | -919.992134  |
| UQCRC2 | $\omega=0.0942$<br>-3495.715877 | 19.3 | 82.1 | $\omega=0.1468$<br>-3560.945293 | $\omega b=0.1014, \omega 0=0.1564$<br>-3514.390029 | $\omega=0.1482$<br>-3549.294862 | -3494.855571 | -3494.855571 | -3494.855571 | -3494.855571 | -3491.977113 | -3491.659476 | -3491.654862 |
| UQCRH  | $\omega=999.00$<br>-775.707529  | 1.0  | 0.0  | $\omega=0.1543$<br>-804.131757  | $\omega b=999, \omega 0=0.1429$<br>-791.084270     | $\omega=0.1432$<br>-791.228696  | -781.347667  | -781.347667  | -781.347667  | -781.347667  | -781.837538  | -781.350948  | -781.350812  |
| UQCRCQ | $\omega=999.00$<br>-725.028334  | 5.1  | 0.0  | $\omega=0.2782$<br>-746.059816  | $\omega b=999, \omega 0=0.2516$<br>-738.350959     | $\omega=0.2548$<br>-738.688474  | -726.207184  | -726.260445  | -727.01973   | -727.01973   | -726.814491  | -726.814491  | -726.554513  |
